1 First analysis of behavioural responses of humpback whales (*Megaptera*  
2 *novaeangliae*) to two acoustic alarms in a northern feeding ground off Iceland

3

4

5 Charla J. Basran<sup>1,2\*</sup>, Benno Woelfing<sup>3</sup>, Charlotte Neumann<sup>4</sup>, Marianne H. Rasmussen<sup>2</sup>

6

7

8

9 <sup>1</sup>Department of Life and Environmental Sciences, University of Iceland, Reykjavik, Iceland

10 <sup>2</sup>Húsavík Research Centre, University of Iceland, Húsavík, Iceland

11 <sup>3</sup>Institute for Terrestrial and Aquatic Wildlife Research, University of Veterinary Medicine,

12 Hannover, Germany

13 <sup>4</sup>University of Southern Denmark, Odense, Denmark

14

15

16 \* Corresponding author

17 Email: [cjb2@hi.is](mailto:cjb2@hi.is)

18

19

20

## 21 **Abstract**

22 Mitigating cetacean entanglement in fishing industries is of global interest. Strategies include  
23 the use of acoustic alarms to warn whales of fishing gear. For baleen whales, responses to  
24 acoustic alarms are poorly understood. This behavioural response study compared the  
25 behaviour of humpback whales (*Megaptera novaeangliae*) in their feeding grounds off  
26 Iceland prior to, during, and after exposure to a low-frequency whale pinger (Future Oceans)  
27 and a high-frequency seal scarer (Lofitech Ltd.). Linear mixed effects models and binary  
28 generalized linear mixed effects models were used to analyze the effect of the alarms on  
29 surface feeding, swimming speed, breathing rate, directness and dive time. We observed a  
30 significant decrease in surface feeding and a significant increase in swimming speed during  
31 exposure to the whale pinger. Changes in dive time between the phases of a trial differed  
32 significantly between individuals indicating that responses may depend on individual or  
33 behavioural state. We did not find any significant reactions in response to the seal scarer. In  
34 addition to the experimental exposures, a trial of whale pingers on a capelin purse seine net  
35 was conducted. Results from this trial showed that whales entered the net from the bottom  
36 while the pingers were attached at the top, but the encircled whales were able to locate an  
37 opening free of pingers and escape without damaging the net. Our results suggest that whale  
38 pingers may be a useful entanglement mitigation tool in humpback whale feeding grounds  
39 given that a reduction in feeding around nets likely reduces the risk of whales swimming  
40 through them. Pingers may also minimize net damage if whales are encircled by aiding the  
41 whales in finding their way out. However, given the uncertain long-term consequences of the  
42 behavioural changes reported here, whale pingers are most advisable for short-term use in  
43 conjunction with other entanglement mitigation measures.

## 44 **Introduction**

45 There is global concern over marine mammal bycatch and entanglement in fishing gear (ie.  
46 animals becoming incidentally caught in gear and drowning, or escaping, sometimes with  
47 gear attached to their body and/or with injuries). Documented impacts of entanglement on  
48 cetaceans include injury [1, 2, 3] , exhaustion of energy budgets [4], emaciation and  
49 drowning [5, 2]. These impacts at the individual level can lead to increased mortality rates at  
50 the population level [6, 7] . Entanglement is known to occur involving many different types  
51 of fishing gear [8] and is likely to affect most cetacean species [9] . Apart from impacts on  
52 cetacean individuals and populations, entanglement also leads to financial losses to the  
53 fishing industry due to loss-of-catch, gear damage or loss and downtime for repairs [10,11].  
54 This can be a particularly serious issue in fisheries experiencing large whale, such as  
55 humpback whale (*Megaptera novaeangliae*), entanglements.

56 Technologies have been developed with the intent to mitigate marine mammal entanglement.  
57 One such technology is acoustic alarms known as “pingers”. These devices can be to attached  
58 to fishing gear and emit a tone underwater within the hearing range of target marine  
59 mammals [12] . The devices serve to “illuminate” the gear with sound and warn the animals  
60 of its presence to encourage them to avoid it. Alternatively, the pingers may simply serve as  
61 an annoying, unnatural sound that the animals want to avoid [13]. Since large whales in  
62 particular can often escape from or carry away entangling gear, it has been suggested that  
63 whales can learn to associate nets and pingers with danger [14] . For cetaceans, specific  
64 pinger acoustic alarms have been developed for porpoises, dolphins and beaked whales  
65 (odontocetes) as well as baleen whales (mysticetes) with varying degrees of success. The  
66 high-frequency porpoise, dolphin and beaked whale pingers have been shown to reduce  
67 bycatch of several species [eg. 15, 16, 17, 18], though on the other hand, some studies have

68 found there to be no change or even increased bycatch of some odontocete species with the  
69 use of pingers [eg. 19, 20] . Whale pinger and low-frequency acoustic alarm sound  
70 experiments have been conducted on baleen whales, including North-Atlantic right whales  
71 (*Eubalaena glacialis*) [21], minke whales (*Balaenoptera acutorostrata*) [22], grey whales  
72 (*Eschrichtius robustus*) [23], and humpback whales [24, 25, 26, 27, 22]. Results from these  
73 experiments were also highly variable. North-Atlantic right whales showed a strong response  
74 to alerting sounds [28], and both minke whales and humpback whales also responded during  
75 testing of whale alarm prototypes [22]. Humpback whales were also less likely to collide with  
76 cod-traps fitted with alarms in Canada [27] and were found to respond to “tone stimuli”  
77 within their hearing range in Australia [29]. By contrast, grey whales did not appear to  
78 respond to acoustic deterrent sounds though results were inconclusive [23] and the majority  
79 of recent research conducted on humpback whales in Australia has concluded there is no  
80 clear response to the modern whale pinger alarms, some of which are now sold commercially  
81 [24, 25, 26]. Despite this, anecdotal reports do claim that some industries have had lower  
82 incidence of humpback whale entanglement with the use of the commercial whale pingers  
83 [30, 31].

84 In addition to the pinger acoustic alarms, acoustic deterrent devices (ADDs) have also been  
85 developed. Primarily used in the aquaculture industry to ward off seals, these devices produce  
86 a loud, high-frequency sound designed to scare away the animals [32]. Though not designed  
87 originally for use to deter cetaceans, it has been observed that at least some cetacean species  
88 react to the loud sound produced by such a device [33, 34]. Testing of ADDs on cetaceans  
89 has found that odontocetes including harbour porpoises [34] , orcas [35] and Pacific white-  
90 sided dolphins [36] are deterred by the devices. The only testing of such a device on baleen  
91 whales was conducted on minke whales in Iceland, and results showed that they too were  
92 deterred from the area with an active ADD [33].

93 Humpback whales are one of the most common cetaceans that frequent the waters off Iceland  
94 in the North Atlantic primarily during their feeding season from spring through autumn [37],  
95 though some sightings are also recorded in the winter months [38]. The summer-time  
96 Icelandic humpback whale population is estimated to be approximately 12,000 individuals  
97 [37] with the highest concentration found off the north/northeast coast (Pike et al. 2019  
98 submitted). It is thought that the humpback whales' diet in Iceland consists of 60% fish  
99 species [39]. The hearing capabilities of humpback whales has been modelled to show that  
100 they have hearing sensitivity between 700 Hz and 10 kHz, with maximum sensitivity between  
101 2-6 kHz [40]. It has been suggested that hearing is likely the most important sense for baleen  
102 whales to orient themselves in their environment [41] and large baleen whales, like the  
103 humpback, may have trouble acoustically detecting fishing gear in the water.

104 Commercial fishing is one of the largest industries in Iceland, with 1588 commercial vessels  
105 registered in 2018 [42]. The fishing methods used in Icelandic waters are long-line/hand-line,  
106 gillnet, trawl, and purse seine [43]. In addition, there are also mussel, oyster, and fish farming  
107 operations in coastal Icelandic waters [44, Kristján Phillips pers. comm. 2019, 45]. At least  
108 one-quarter of the coastal Icelandic humpback whale population is estimated to have been  
109 entangled in fishing gear at least once [46], and virtually all of the fishing methods in the  
110 country have reported issues with humpback whales swimming through, and sometimes  
111 becoming entangled in, the gear in the water [47, 44]. This has caused gear damage or loss, as  
112 well as injury or death to the whales in some cases [46, 47, 48, 49].

113 Currently there are no mitigation methods or regulations in place for minimizing whale  
114 entanglement in fishing gear in Iceland, despite growing concern in the local fishing  
115 industries. This study conducted the first analysis of behavioural response of free-ranging  
116 humpback whales in their northern feeding grounds off the coast of northeast Iceland to the  
117 whale pinger acoustic alarm (Future Oceans) and the seal scarer acoustic deterrent device

118 (Lofitech AS ltd.). In addition to the experimental exposure of whales to the acoustic alarms,  
119 this study conducted the first trial of the whale pingers in the capelin purse seine fishery in  
120 Iceland. Results from this study help to decide if acoustic alarms are likely to effectively  
121 mitigate humpback whale entanglement in their feeding grounds and shed light on possible  
122 adverse effects of the alarms on natural humpback whale behaviour.

## 123 **Materials and Methods**

### 124 **Study area**

125 Trials of the whale pinger acoustic alarm took place in two locations in Northeast Iceland:  
126 Skjálfandi Bay and Eyjafjörður (Fig 1). Skjálfandi ( $66^{\circ}05'N17^{\circ}33'W$ ) is an approximately  
127 11,000 km<sup>2</sup> bay well known for predictable humpback whale sightings from spring through  
128 autumn during the feeding season. The bay harbours the fishing-turned-whale watching town  
129 of Húsavík on the southeast shore [50, 51, 52, A. Gíslason unpubl. data]. Eyjafjörður  
130 ( $65^{\circ}50'N18^{\circ}07'W$ ) is an approximately 440km<sup>2</sup> narrow fjord (S. Jónsson unpubl. data)  
131 located approximately 80km west of Skjálfandi Bay. Like Skjálfandi, Eyjafjörður is also well  
132 known for humpback whale sightings and harbours fishing and whale watching in the city of  
133 Akureyri as well as the towns of Dalvík, Hauganes and Hjalteyri. Trials of the seal scarer  
134 acoustic alarm took place only in Skjálfandi Bay.

135 The practical trial of the whale pinger took place in collaboration with a capelin purse seine  
136 vessel based in Neskaupstaður in East Iceland. The boat fished for capelin off South Iceland  
137 (Fig 1).

138 **Fig 1. Map showing the locations of humpback whale behavioural response trials (1.**  
139 **and 2.) using the whale pinger and/or seal scarer, and location where capelin fishing**

140 **with a purse seine net equipped with the whale pingers took place during onboard**  
141 **observation (3.).**

## 142 **Acoustic alarms**

143 Two acoustic alarms were used in the present study. First was the 2016 version of the Future  
144 Oceans whale pinger. This device operates on a single 3.6V lithium battery and activates  
145 automatically when in contact with saltwater. When active, the alarm produces a 145 decibel  
146 re 1 $\mu$ Pa tone at 3kHz for 300 ms at 5 sec intervals (Future Oceans) (Fig 2). The second alarm  
147 was the Lofitech AS ltd. seal scarer ADD composed of a control box with a 25m long cable  
148 with a transducer unit at the end which produces the sound. This control box is powered by a  
149 12V marine battery onboard the boat. When active, the alarm produces a 191 decibel re 1 $\mu$ Pa  
150 sound between 10-20 kHz for 500ms at random intervals of 5-60 sec (Fig 3). A calibration of  
151 both acoustic alarm devices was conducted in a harbour to confirm the manufacturers  
152 specifications. Each device was lowered 5m into the water and recorded by a Reson 4032  
153 hydrophone connected to an Etec amplifier with the sound signal recording to a Microtrack  
154 recorder. The whale pinger was recorded at distances of 1, 5, 10 and 20m from the  
155 hydrophone, while the seal scarer was recorded at 20, 30 and 40m. The recorded signal from  
156 the alarms was compared with a 153 dB rms calibration signal recorded using a calibrator  
157 with an adapter for the 4032 Reson hydrophone.

158 **Fig 2. Photograph showing the whale pinger alarm.**

159 **Fig 3. Photograph showing the seal scarer alarm.**

160 The emitted sound from the whale pinger had an actual source level of 137 dB re 1 $\mu$ Pa (rms)  
161 recorded at a distance of 1 m. The levels at 5, 10 and 20 m were 137 dB, 140 dB and 144 dB  
162 re 1 $\mu$ Pa (rms) respectively using spherical spreading as transmission loss. Based on previous  
163 modelling of the pinger sound, humpback whales are expected to detect the sound at a

164 distance of at least 500m from the source [24, 26]. The seal scarer had an actual source level  
165 of 189-198 dB re 1 $\mu$ Pa (rms) measured at a distance of 20, 30 and 40 m using spherical  
166 spreading (of 20 Log R) as transmission loss.

## 167 **Experimental exposure to acoustic alarms**

168 Experimental exposures of humpback whales to acoustic alarms were conducted in Skjálfandi  
169 Bay in June, July and October 2017, and in June and October 2018. In Eyjafjörður, trials  
170 were conducted in May and July 2018. A private boat was used for each trial with a captain  
171 and 3-4 researchers and students onboard. Data collected during the trials were recorded with  
172 the Logger 2010 computer program (IFAW) and a video recording of each trial was taken  
173 using a hand-held video camera (Sony HDR-CX160E handycam). Logger 2010 recorded  
174 time, GPS position of the boat, heading of the boat, and any comments that were entered by  
175 the student recorder. Trials were attempted when the sea state was considered 3 or less on the  
176 Beaufort scale. During a behavioural trial, an individual focal humpback whale was chosen  
177 based on the criteria that it was swimming alone and that there were no whale watching boats  
178 observing the animal. Photo-identification images of the individual were taken of the unique  
179 pattern on the underneath side of the fluke and of the dorsal fin. This was to ensure each  
180 individual whale was not exposed to the same device more than once within the same year, to  
181 avoid possible habituation to the alarm sound. When photo-identification was complete, the  
182 pre-exposure phase (*PrE*) began with the boat following the focal whale from a distance of  
183 approximately 100m for 30 mins to obtain a baseline of behaviour of the individual. The  
184 100m distance complies with whale watching criteria set forth in many countries around the  
185 world to minimize disturbance to the animal [53] while still being within range to collect all  
186 necessary data. Each breath the whale took was recorded as “up” and each terminal dive was  
187 recorded as “dive” in Logger 2010. Other information was also noted, including if the whale  
188 dove with or without raising the fluke, if the whale appeared to be feeding, and if there were



189 other whales in the area. Furthermore, one researcher used an angle-board and rangefinder to  
190 obtain the angle to the whale in relation to the boat and the distance to the whale, and this  
191 data was also recorded into Logger 2010. If the distance could not be obtained from the  
192 rangefinder, one researcher estimated the distance to the whale when it took a terminal dive.  
193 The angle-board, rangefinder, and distance estimation were always done by the same  
194 researcher (C.J.B) for consistency. Once the *PrE* phase was complete, the boat was  
195 positioned beside where the focal whale was seen taking its last terminal dive and the engine  
196 was turned off. To begin the 15 min exposure phase (*E*), the whale pinger or the seal scarer  
197 was placed off the side of the boat into the water at 5m depth, attached to a rope and buoy  
198 similar to Harcourt et al [26] . The breaths, dives, angles, and distances of the focal whale  
199 were then recorded in Logger 2010 in the same manner as in *PrE* phase. After the 15 min *E*  
200 phase ended, the alarm device was removed from the water and the boat was positioned  
201 approximately 100m from the focal whale to follow it and record the same data for an  
202 additional 30 mins for the post-exposure phase (*PoE*).

## 203 **Behavioural variables**

### 204 **Feeding**

205 The number of surface feeding events was determined by watching the video footage of each  
206 phase of each behavioural trial. For each surfacing of the focal whale, surface feeding  
207 behaviour was categorized as yes (Y), no (N), or not able to determine (NA). Feeding  
208 behaviour was recognized by observing surface lunging behaviour or expanded throat pleats  
209 indicating the whale had a full mouth (Fig 4). A surfacing was also categorized as Y if  
210 researchers audibly indicated the whale was feeding in the video even though the surfacing  
211 was not visible in the footage.

212 **Fig 4. Photographs showing lunge-feeding behaviour and expanded throat pleats used**  
213 **to determine if the focal whale was surface feeding in the analysis of the videos.**

### 214 **Swimming speed**

215 The swimming speed of the focal whale was calculated for each phase of each behavioural  
216 trial, when enough data was available. Speed was calculated from each terminal dive to the  
217 next terminal dive (and therefore included distance information from when the focal whale  
218 was diving and was at the surface).

### 219 **Breathing rate and dive time**

220 For each phase of each behavioural trial, the breathing rate of the focal whale was calculated  
221 as breaths per minute for each surface interval (the time between diving). The time of each  
222 dive in seconds in each phase of each trial was also calculated from the time stamps of “dive”  
223 and the following “up” recorded in Logger 2010.

### 224 **Directness index**

225 A directness index (DI) from 0-100, indicating the directness of the swimming pattern of the  
226 focal whale, was calculated for each phase of each behavioural trial, when enough data was  
227 available. Firstly, the coordinate position of the whale at each terminal dive was calculated.  
228 Then, the DI was calculated as the distance between the two end points of the track divided  
229 by the sum of the distances between all the points in the track, and the result multiplied by  
230 100. A DI of 0 indicates swimming in a complete circle, while a DI of 100 indicates  
231 swimming in a straight line.

### 232 **Analysis of behavioural response variables**

233 We tested the effect of exposure to both acoustic alarms (whale pinger and seal scarer) on  
234 four response variables: speed, breathing rate, directness and dive time using linear mixed

235 effects models. Separate models were set up for each acoustic alarm and each response  
236 variable. The phase of the trial (*PrE*, *E*, *PoE*) was the only fixed effect predictor variable. To  
237 account for the repeated measures within individual whales, trial-ID was included as a  
238 random intercept term in all models. Plots of residual versus fitted values revealed that speed  
239 and breathing rate needed to be log-transformed to satisfy the modeling assumption of  
240 homogeneity of variances. Plots of the autocorrelation function of the residuals revealed  
241 significant temporal autocorrelation in the models for  $\ln(\text{speed})$ ,  $\ln(\text{breathing rate})$  and dive  
242 time. Auto-regressive correlation structures of order 1 were specified in the models for these  
243 response variables. Inspection of the plots of the autocorrelation functions verified that this  
244 successfully accounted for the observed autocorrelation.

245 Since previous findings suggested individual response to sound can depend on behavioural  
246 state [54], individual-specific response variation was incorporated into our models by  
247 introducing random slopes for the predictor phase for all response variables. We tested if  
248 random intercept and slope models fitted the data better than pure random intercept models.  
249 As recommended by Zuur et al. [55] selection of the random effects structure was done prior  
250 to selection of the fixed effects structure and was based on a likelihood ratio test comparing  
251 the pure random intercept model with the random intercept and slope model. Subsequently,  
252 likelihood ratio tests were used to select the optimal fixed effects structure, i.e. to compare  
253 models with phase as fixed effect to pure intercept models. For models in which phase had a  
254 significant effect, a posthoc pairwise comparison with Bonferroni correction was used to  
255 infer between which phases significant changes of the response variable occurred. These  
256 statistical analyses were performed using the libraries nlme [56] and multcomp [57] in the  
257 statistical software R (R Foundation for Statistical Computing).

258 Surface feeding behaviour was recorded as a binary variable and thus could not be modelled  
259 by linear mixed effects models. We fitted a binary generalized linear mixed effects model

260 using the function `glmer` in the `lme4`-package [58]. Model specification and selection was  
261 analogous to the protocol described for the linear mixed effects models except for the  
262 specification of the autocorrelation structure. Since the `glmer`-function does not allow for the  
263 specification of temporal correlation structures, the feeding behaviour at the previous  
264 surfacing event (`lag1_feeding`) was included as a fixed effect to account for temporal  
265 autocorrelation. Surface feeding behaviour could only be analyzed for whale pinger (WP)  
266 trials, because very little surface feeding was observed in all phases of the seal scarer (SS)  
267 trials.

## 268 **Purse-seine trial of the whale pingers**

269 In addition to the individual exposure trials, the whale pingers were also used in a practical  
270 application trial on board a capelin purse seine vessel (Börkur NK122) for the 2018 season  
271 (January-March) operating out of Neskaupstaður in east Iceland. For the season prior to the  
272 trial (January – March 2017), the captain of the vessel kept a log of humpback whale  
273 sightings and any encirclements in the net. For the 2018 capelin fishing season, ten pingers  
274 were attached to the float line of the purse-seine at a distance of 30-40m from each other,  
275 complying with the manufacturer's recommendations. The captain of the vessel kept record  
276 of any issues there were with the use of the pingers, and any incidences of whales inside the  
277 net. In addition, one researcher (C.J.B.) joined as an onboard observer for one trip (February  
278 24-28, 2018). During onboard observations, the track of the vessel and whale sightings were  
279 recorded in the SpotterPro app (Conserve.IO) during all transit and active fishing days. The  
280 number of net casts and tonnes of fish caught with each cast was also noted. Any  
281 encirclements of whales with the net were video recorded for documentation using a hand-  
282 held video camera (Sony HDR-CX160E handycam).

## 283 Results

### 284 Experimental exposure to acoustic alarms

285 A total of 23 research trips were undertaken in 2017-2018 totalling approximately 83 hours of  
 286 effort (Table 1). Of these, enough data for analysis was collected on 14 trips resulting in 9  
 287 WP trials and 7 SS trials.

288 **Table 1. Data collection trips undertaken in 2017-2018 with the Date (DD.MM.YY), Location**  
 289 **(SB = Skjálfandi Bay, EF = Eyjafjörður), number of hours (Hours), what trial was completed**  
 290 **(Trial Complete: na = not available; no usable trial, SS = seal scarer, WP = whale pinger), and**  
 291 **the reason the trip did not result in a usable trial (Reason if na).**

| Date     | Location | Hours | Trial Complete | Reason if na                               |
|----------|----------|-------|----------------|--------------------------------------------|
| 29.04.17 | SB       | 3.5   | na             | Whale disappeared during WP exposure phase |
| 03.05.17 | SB       | 4.5   | SS             |                                            |
| 04.05.17 | SB       | 3     | na             | No usable whale                            |
| 04.05.17 | SB       | 3     | na             | Boat broke down                            |
| 16.06.17 | SB       | 3.5   | WP             |                                            |
| 20.06.17 | SB       | 4.5   | WP             |                                            |
| 27.06.17 | SB       | 4.5   | SS             |                                            |
|          |          |       | SS             |                                            |
| 28.06.17 | SB       | 3     | WP             |                                            |
| 11.07.17 | SB       | 4     | na             | No usable whale                            |
| 14.07.17 | SB       | 6.5   | WP             |                                            |
|          |          |       | SS             |                                            |
| 21.08.17 | SB       | 2.5   | na             | Rough seas                                 |
| 01.10.17 | SB       | 3.5   | WP             |                                            |
| 28.04.18 | EF       | 1.5   | na             | Rough seas                                 |
| 30.04.18 | EF       | 2     | na             | Rough seas                                 |

|          |    |     |    |                                            |
|----------|----|-----|----|--------------------------------------------|
| 02.05.18 | EF | 4   | WP |                                            |
| 08.05.18 | EF | 5   | na | Whale disappeared during WP exposure phase |
| 07.06.18 | SB | 3.5 | WP |                                            |
| 12.06.18 | SB | 3.5 | WP |                                            |
| 11.07.18 | EF | 3   | na | Rough seas                                 |
| 09.10.18 | SB | 3.5 | WP |                                            |
| 15.10.18 | SB | 3.5 | SS |                                            |
| 14.11.18 | SB | 3.5 | SS |                                            |
| 21.11.18 | SB | 4   | SS |                                            |

292

293 Fifteen individual whales were used for the successful behavioural trials which produced  
 294 usable data (Fig 5). Only one individual whale was used twice, in two separate SS trials, but  
 295 these trials were conducted 18 months apart. Fourteen of the individuals could be identified  
 296 in the Húsavík Research Center humpback whale catalogues. One individual in Eyjafjörður  
 297 was not identifiable beyond confirming that it was only used once in the study.

298 **Fig 5. Table showing the individuals used for each successful behavioural trial (expressed by**  
 299 **identification code and nickname), location (SB = Skjálfandi Bay, EF = Eyjafjörður), the device**  
 300 **used in the trial and the trial ID number (WP = whale pinger, SS = seal scarer), and the data**  
 301 **that was collected in each trial (B = breathing rate, DI = directness index, D = dive time, S =**  
 302 **swimming speed, F = feeding). Data codes denoted with an \* indicate trials for which data is**  
 303 **only available for the pre-exposure and exposure phases.**

304 There were eleven attempts made to complete a WP trial, resulting in nine usable trials. Out  
 305 of these eleven attempts, the individual whale was considered lost (disappeared for more than  
 306 20 minutes) in three cases (WP1, WP7, WP8). Two out of these three cases did not result in  
 307 enough data to be included in the analysis (WP1, WP8). No individuals were lost during SS  
 308 trials.

309 Averages of the behavioural response variables for the *PrE*, *E* and *PoE* phases of each WP  
 310 trial are shown in Fig 6. Full models for each behavioural response variable included the  
 311 experimental phase (*PrE*, *E*, *PoE*) as fixed effect and a random intercept and slope (for  
 312 experimental phase) in addition to an autoregressive correlation structure of order 1 as  
 313 random effects. Random slope models did not fit the data significantly better than random  
 314 intercept models for the behavioural response variables speed, surface feeding, breathing rate  
 315 and directness (Table 2). Thus, there was no statistical support for individual variation in  
 316 these responses.

317 **Fig 6. Averages of the behavioural response variables breathing rate, dive time, directness and**  
 318 **speed for the pre-exposure (PrE), exposure (E) and post-exposure (PoE) phases of each whale**  
 319 **pinger (WP) trial. Stars highlight individual whale pinger trials in which the response variable**  
 320 **differed significantly between the phases (\* uncorrected  $p < 0.05$ ; \*\* Bonferroni-corrected  $p <$**   
 321 **0.05). Letters indicate between which phases significant differences occurred. Models for**  
 322 **individual whale pinger trials were only calculated for response variables for which overall**  
 323 **models found a significant effect of phase or random slope (see Table 3).**

324 **Table 2. Assessment of the random and fixed effects structures of five models explaining the**  
 325 **change in a behavioural response variable after exposure to a whale pinger. To test if the effect**  
 326 **sizes of the contrasts to the pre-exposure phase differed significantly between individuals, a**  
 327 **random intercept and slope model was compared to a pure random intercept model by means of**  
 328 **comparison of Akaike Information Criterion (AIC) values and a likelihood ratio test. The fixed**  
 329 **effects structure was tested by comparing models with and without the predictor phase.**  
 330 **Assessment of random effects was based on models estimated by restricted maximum likelihood,**  
 331 **whereas assessment of fixed effects was based on maximum likelihood estimation. Significant p-**  
 332 **values are bolded.**

| <b>Response Variable</b> | <b>Test</b>         | <b>AIC (intercept model)</b> | <b>AIC (complex model)</b> | <b>Chi-squared</b> | <b>DF</b> | <b>p-value</b> |
|--------------------------|---------------------|------------------------------|----------------------------|--------------------|-----------|----------------|
| Ln(Breathing rate)       | Random effect slope | 471.0                        | 475.0                      | 0                  | 2         | 1              |

|                 |                     |        |        |       |   |                  |
|-----------------|---------------------|--------|--------|-------|---|------------------|
|                 | Fixed effect phase  | 461.1  | 463.4  | 1.755 | 2 | 0.42             |
| Dive time       | Random effect slope | 2557.2 | 2518.2 | 43    | 2 | <b>&lt;0.001</b> |
|                 | Fixed effect phase  | 2541.6 | 2545.1 | 0.479 | 2 | 0.79             |
| Directness      | Random effect slope | 176.7  | 180.1  | 0.59  | 2 | 0.75             |
|                 | Fixed effect phase  | 194.0  | 196.2  | 1.833 | 2 | 0.40             |
| Ln(Speed)       | Random effect slope | 411.4  | 414.7  | 0.73  | 2 | 0.69             |
|                 | Fixed effect phase  | 412.4  | 406.1  | 10.28 | 2 | <b>0.006</b>     |
| Surface feeding | Random effect slope | 483.3  | 487.3  | 0.059 | 2 | 0.97             |
|                 | Fixed effect phase  | 487.3  | 483.3  | 7.97  | 2 | <b>0.019</b>     |

333

334 The predictor phase had a significant effect on both speed ( $p = 0.006$ ; Table 2) and surface  
 335 feeding ( $p = 0.019$ ; Table 2). Humpback whale speed during the *E* phase was 1.7 times higher  
 336 than during the *PoE* phase ( $p = 0.0024$ ; Table 3) and 1.4 times higher than during the *PrE*  
 337 phase ( $p = 0.11$ ; Table 3). No significant differences in humpback whale speed were observed  
 338 between the *PrE* and *PoE* phases ( $p = 0.62$ ; Table 3). The probability of surface feeding was  
 339 significantly lower during the *E* phase than during the *PoE* phase ( $p = 0.026$ ; Table 4). The  
 340 reduction in surface feeding from the *PrE* to the *E* phase was marginally significant ( $p =$   
 341  $0.099$ ; Table 4). Rates of surface feeding amounted to 11% and 13% in the *PrE* and *PoE*  
 342 phases and dropped to 4% in the *E* phase (Fig 7).

343 **Table 3. Posthoc comparison for the predictor phase (*PrE* = pre-exposure, *E* = exposure, *PoE* =**  
 344 **post-exposure) in the swimming speed model based on the whale pinger data (See Table 2).**  
 345 **Since the response variable speed is ln-transformed, effect is the difference in ln(speed) and**  
 346  **$e^{\wedge}$ Effect is the ratio between speeds in the two compared phases. Adjusted p-values are**  
 347 **Bonferroni-corrected p-values. Significant p-values are bolded.**

| Posthoc Comparison | Effect on ln(speed) | $e^{\wedge}$ Effect | Std. Error | Adjusted p-value |
|--------------------|---------------------|---------------------|------------|------------------|
| <i>E - PrE</i>     | 0.35                | 1.42                | 0.17       | 0.11             |
| <i>PoE - PrE</i>   | -0.18               | 0.83                | 0.14       | 0.62             |
| <i>PoE - E</i>     | -0.53               | 0.59                | 0.16       | <b>0.0024</b>    |

348



349 **Table 4. Posthoc comparison for the predictor phase (*PrE* = pre-exposure, *E* = exposure,**  
350 ***PoE* = post-exposure) in the surface feeding model based on the whale pinger data (See**  
351 **Table 2). Effect and std. error are the effect size on the linear predictor scale and its**  
352 **standard error. Adjusted p-values are Bonferroni-corrected p-values. Significant p-**  
353 **values are bolded.**

| Posthoc Comparison | Effect on surface feeding | Std. Error | Adjusted p-value |
|--------------------|---------------------------|------------|------------------|
| <i>E - PrE</i>     | -1.02                     | 0.48       | 0.099            |
| <i>PoE - PrE</i>   | 0.21                      | 0.26       | 1                |
| <i>PoE - E</i>     | 1.22                      | 0.47       | <b>0.026</b>     |

354

355 **Fig 7. Graph showing the probability of surface feeding during whale pinger trials for**  
356 **each phase (*PrE* = pre-exposure phase, *E* = exposure phase, *PoE* = post-exposure phase).**  
357 **P-values are Bonferroni-corrected p-values obtained in the posthoc comparison (See**  
358 **Table 4).**

359 No significant changes in breathing rate ( $p = 0.42$ ; Table 2) and directness ( $p = 0.40$ ; Table 2)  
360 were detected in response to exposure to whale pinger sound. The model for dive time was  
361 the only case in which a random slope model fitted the data significantly better than a random  
362 intercept model ( $p < 0.001$ ; Table 2). Phase of the trial, however, had no significant effect on  
363 dive time ( $p = 0.79$ ; Table 2).

364

365 The averages of the behavioural response variables for the *PrE*, *E* and *PoE* phase of each SS  
366 trial are displayed in Fig 8. Models of the behavioural response variables were set up in the  
367 exact same manner as for the WP trial analysis. Random slope models did not fit the data  
368 significantly better than random intercept models for any of the response variables (Table 5).  
369 Experimental phase did not have a significant effect on any of the response variables (Table

370 5). Thus, we found no evidence for an individual-specific or shared response of humpback  
 371 whales to seal scarer alarm.

372 **Fig 8. Averages of the behavioural response variables breathing rate, dive time,**  
 373 **directness and speed for the pre-exposure (PrE), exposure (E) and post-exposure (PoE)**  
 374 **phases of each seal scarer (SS) trial.**

375 **Table 5. Assessment of the random and fixed effects structures of five models explaining**  
 376 **the change in a behavioural response variable after exposure to a seal scarer. To test if**  
 377 **the effect sizes of the contrasts to the pre-exposure phase differed significantly between**  
 378 **individuals, a random intercept and slope model was compared to a pure random**  
 379 **intercept model by means of comparison of Akaike Information Criterion (AIC) values**  
 380 **and a likelihood ratio test. The fixed effects structure was tested by comparing models**  
 381 **with and without the predictor phase. Assessment of random effects was based on**  
 382 **models estimated by restricted maximum likelihood, whereas assessment of fixed effects**  
 383 **was based on maximum likelihood estimation.**

| Response Variable  | Test                | AIC (intercept model) | AIC (complex model) | Chi-squared | DF | p-value |
|--------------------|---------------------|-----------------------|---------------------|-------------|----|---------|
| Ln(Breathing rate) | Random effect Slope | 271.8                 | 275.8               | 0           | 2  | 1       |
|                    | Fixed effect Phase  | 262.2                 | 265.0               | 1.18        | 2  | 0.55    |
| Dive time          | Random effect Slope | 1427.3                | 1418.7              | 12.6        | 2  | 0.002   |
|                    | Fixed effect Phase  | 1447.1                | 1446.5              | 4.594       | 2  | 0.1     |
| Directness         | Random effect Slope | 143.4                 | 147.0               | 0.4431      | 2  | 0.81    |
|                    | Fixed effect Phase  | 159.6                 | 162.4               | 1.2         | 2  | 0.55    |
| Ln(Speed)          | Random effect Slope | 237.4                 | 238.9               | 2.473       | 2  | 0.29    |
|                    | Fixed effect Phase  | 226.5                 | 230.4               | 0.138       | 2  | 0.93    |

384

### 385 **Purse-seine trial of the whale pingers**

386 The captain of the participating capelin purse seine vessel did not report any issues with  
 387 humpback whales inside the net in the 2017 season and reported that there were generally

388 lower sightings and incidences than in the previous (2016) season. During the 2018 capelin  
389 fishing season, the onboard observer recorded 34 individual humpback whale sightings at 7  
390 locations during 16 hours of observation (Table 6) with 70.6% (n = 24) occurring while the  
391 boat was in the capelin fishing grounds off the south/southwest coast of Iceland. The net was  
392 cast 3 times during onboard observation and a total of 1510 tonnes of capelin were caught.  
393 Whales at the surface near the vessel when fishing operations were beginning were noted to  
394 swim away from the area, with one whale specifically observed turning 180 degrees to go  
395 opposite of where the seine net was being set into the water. There were two incidences  
396 where humpback whales were encircled in the net fitted with the whale pingers during 2018,  
397 once when the onboard observer was present and once when they were not. In both  
398 incidences two humpback whales appeared at the surface inside the net once the bottom of  
399 the net was being closed, indicating the whales entered from the bottom. During the onboard  
400 observation incident, it was noted the whales were “trumpeting” and showed signs of being  
401 distressed by the encirclement in the net. In an attempt to release the whales in both cases, the  
402 extra line attaching the end of the net to the vessel, without floats or pingers attached, was not  
403 brought in towards the boat while the net was closed at the bottom creating an approximately  
404 100m wide opening in the side of the net towards the stern. During the onboard observation  
405 encirclement, the two whales spent approximately 5 minutes inside the net before locating the  
406 opening and escaping without causing any damage. According to the captain the second  
407 incident occurred in the exact same manner. The captain and crew reported that whales  
408 rarely, if ever, find this opening and escape without further action or damage to the net in  
409 previous seasons when the pingers were not in use. Only 270 tonnes of capelin were caught  
410 in the cast where the whales were encircled in the net during onboard observation (compared  
411 to 690 and 550 tonnes in the other two casts).

412 **Table 6. Effort during onboard observation on the capelin purse seine vessel using the**  
 413 **whale pingers including date (DD,MM,YY), time, whale sightings (Mn = humpback**  
 414 **whale (*Megaptera novaeangliae*), Bp = fin whale (*Balaenoptera physalus*), location**  
 415 **(latitude, longitude), status of the boat, and comments. A \* denotes in which sighting**  
 416 **two whales were encircled in the net.**

| Date     | Time        | Sightings | Boat Location               | Status                          | Comments            |
|----------|-------------|-----------|-----------------------------|---------------------------------|---------------------|
| 24.02.18 | 20:00       |           |                             | leaving port                    |                     |
| 25.02.18 | 9:00-12:00  | 1Mn       | 63.514593N -<br>17.864615W  | transit                         |                     |
| 25.02.18 | 13:40-15:40 | NA        |                             | transit                         |                     |
| 25.02.18 | 16:10-18:10 | 4Mn       | 63.430734N, -<br>19.595009W | transit/docking                 | Two pairs of whales |
|          |             |           | 63.437207N, -<br>19.901842W |                                 |                     |
| 26.02.18 |             |           |                             | in port                         |                     |
| 27.02.18 | 9:30-11:45  | 9Mn       | 63.722643N, -<br>20.818695W | transversing grounds            |                     |
|          |             |           | 63.727772N, -<br>20.836443W |                                 |                     |
|          |             |           | 63.736444N, -<br>20.884974W |                                 |                     |
|          |             |           | 63.737366N, -<br>20.887947W |                                 | Pair of whales      |
|          |             |           | 63.75826N, -<br>20.912274W  |                                 |                     |
|          |             |           | 63.764711N, -<br>20.92963W  |                                 | Pair of whales      |
|          |             |           | 63.785706N, -<br>20.989416W |                                 |                     |
| 27.02.18 | 13:30-16:00 | 3Mn       | 63.766879N, -<br>20.969197W | transversing<br>grounds/fishing |                     |
|          |             |           | 63.729173N, -<br>20.892273W |                                 |                     |
|          |             |           | 63.784402N, -<br>20.985329W |                                 |                     |
| 27.02.18 | 17:00-18:00 | 3Mn       | 63.604162N, -<br>20.773594W | transversing grounds            | Pair of whales      |
|          |             |           | 63.596906N, -<br>20.714554W |                                 |                     |
| 28.02.18 | 8:35-10:00  | 6Mn*      | 63.499573N, -<br>20.940331W | fishing                         | Pair of whales      |
|          |             |           | 63.498824N, -<br>20.937591W |                                 |                     |
|          |             |           | 63.498249N, -<br>20.945592W |                                 |                     |
|          |             |           | 63.500046N, -<br>20.946389W |                                 |                     |
|          |             |           | 63.499475N, -<br>20.9425W   |                                 |                     |

|          |             |     |                             |         |  |
|----------|-------------|-----|-----------------------------|---------|--|
| 20.02.18 | 16:45-18:00 | 5Mn | 63.372122N, -<br>18.879468W | transit |  |
|          |             |     | 63.36858N, -<br>18.812109W  |         |  |
|          |             |     | 63.367307N, -<br>18.774776W |         |  |
|          |             |     | 63.378524N, -<br>18.599105W |         |  |
|          |             |     | 63.382446N, -<br>18.559984W |         |  |
|          |             | 1Bp | 63.369304N, -<br>18.693336W |         |  |

417

## 418 Discussion

419 Mitigating large whale entanglement in fishing industries is of global interest. This study  
420 represents the first in situ experiments testing commercially available acoustic alarms on  
421 humpback whales in their North Atlantic feeding grounds off Iceland, and the first study to  
422 consider feeding as a behavioural response variable. Results showed that it was significantly  
423 less likely to observe surface feeding behaviour during the *E* phase of the WP trials, when the  
424 whale pinger was active in the water, compared to when the whales were observed prior to  
425 and after exposure. This suggests that the whales reduce or stop surface feeding in response  
426 to the pinger. Previous studies have found that humpback whales cease feeding in response to  
427 sonar sounds [59], decrease side roll feeding in response to ship noise [60], and decrease  
428 detectable lunge feeding behaviour during approaches of whale watching vessels in one of  
429 the study sites for this experiment (Skjálfandi Bay) [61], suggesting reduction in feeding may  
430 be a common response when whales are exposed to anthropogenic noise. This is the first time  
431 a reduction in feeding behaviour has been documented in response to a pinger alarm and we  
432 can only hypothesize why the whales would react this way. One possibility is that they are  
433 simply distracted by or curious about the sudden introduction of an unnatural and unfamiliar  
434 sound in their environment. Since the received sound level from the whale pinger was likely  
435 low, it is unlikely that the whales were startled and stopped feeding, and there was no clear  
436 indication that they moved away from the sound based on results from the directness index

437 model. However, three out of the eleven individuals involved in attempted WP trials were  
438 declared lost (disappeared for more than 20 minutes) during the *E* phase when the whale  
439 pinger was in the water. Two out of the three cases (WP1, WP8) did not have enough data to  
440 include them in analysis. The first individual (WP1) took one dive approximately 200m away  
441 after the *E* phase started and then never resurfaced in sight. The second individual (WP7),  
442 which was included in analysis, started traveling and stopped diving with the fluke in the air  
443 shortly after the *E* phase began and was last sighted an estimated 1000m away before it was  
444 lost. The third individual (WP8) was last seen before the pinger was put in the water to begin  
445 the *E* phase and was not seen again within 20 minutes after the *E* phase began. Since the boat  
446 was stationary during the *E* phase of the trials, the probability of losing sight of the whale is  
447 higher than during the *PrE* and *PoE* phases when the boat is maneuvered. However, trials  
448 were only conducted in good weather with good visibility and therefore the complete  
449 disappearance in the 15-minute *E* phase was most likely due to a change in behaviour. It is  
450 possible that these individuals were disturbed by the pinger sound and moved away.

451 Lien et al. [27] reported that there was an increase in cod catch in traps that had alarms  
452 attached than those that did not, suggesting target fish species are not affected by the alarms.  
453 Humpback whales are primarily feeding on smaller fish species in the North Atlantic, such as  
454 capelin [62]. Fish are modelled to hear at low frequencies below 0.5-1 kHz and react to high  
455 intensity sound [63], therefore it is unlikely that the pinger sound affected the prey that the  
456 whales were feeding on during the trials. This suggests that the whales responded to the  
457 pinger sound directly rather than to a change in prey distribution or behaviour.

458 Whales reducing or stopping their feeding in response to the pinger, could lead to lower  
459 incidence of humpback whale encirclement and entanglement in Icelandic fisheries since the  
460 whales are likely feeding when these incidences occur. Humpback whales in coastal polar  
461 waters have been recorded making an average of 28 feeding lunges per hour in Antarctica

462 [64], and a tagged whale in the primary field site for this study (Skjálfandi Bay) was similiary  
463 recorded making an average of 33 feeding lunges per hour [61], suggesting the majority of  
464 their time is spent foraging. Furthermore, entanglement of humpback whales has been  
465 observed as coinciding with the spawning of one of their main prey species, capelin, in  
466 Newfoundland Canada [65] and encirclement of humpbacks in Iceland that were evidently  
467 feeding on capelin at the time of the incident was observed during this study. We therefore  
468 hypothesize that if the whales stop feeding in the vicinity of fishing gear with active pingers  
469 they may be more likely to take notice of the gear and less likely to become entangled or  
470 encircled. Therefore, the pingers may be a useful mitigation tool. The whales that were  
471 encircled in the purse seine net using the pingers in this study were not surface feeding and  
472 entered the net from deeper than 120m while the pingers were near the surface of the water,  
473 which may indicate the pingers were not in the correct position to cause the whales to stop  
474 feeding and avoid entering the net. Overall, this suggests that if the whales stop feeding in  
475 response to the pinger, it may reduce the risk of them becoming entangled or encircled in the  
476 fishing gear, but the pingers need to be positioned strategically on the net at the appropriate  
477 depth to elicit the reduced feeding response. Further experimentation with the pingers at  
478 different depths and tagging of the whales in order to have information about their  
479 underwater feeding activity could provide valuable information for this hypothesis.

480 Disruption of feeding behaviour in these whales is cause for concern for negative impacts on  
481 the individual, and possibly the population, if pinger use becomes widespread in the fishing  
482 industry. Humpback whales need to consume an estimated 1432 Kcal of food per day during  
483 the summer feeding season in order to have a large energy storage for their migration and  
484 winter breeding season [39]. Insufficient energy stores may lead to decreased ability to  
485 migrate or decreased reproductive success, which can furthermore impact the recruitment rate  
486 of the population [66]. However, it is important to note that exposure to the whale pinger

487 during the *E* phase was only for 15 minutes, so it is unknown if the whales would habituate to  
488 the sound and continue feeding normally after a longer period of time. We did not observe  
489 any lasting effect of the whale pinger on surface feeding, suggesting that when the pinger is  
490 removed from the water the whale quickly returns to its post-exposure behaviour. Further  
491 investigation into the humpback whale's feeding response to low frequency acoustic alarms is  
492 recommended for the future in order to determine if this response is consistent within larger  
493 sample sizes and if it is detected in other humpback whale feeding grounds. It is also  
494 advisable to investigate what the response of the whales is to longer exposure to the alarms to  
495 determine if reduction in feeding is only a short-term consequence or is a longer response.  
496 Given the uncertainty of the effects of long-term use, the whale pingers may be particularly  
497 advisable for fishing methods in which the gear is not in the water for long periods of time  
498 such as attached to purse seine nets or suspended in the water from long-line vessels.

499 The whales also significantly increased their swimming speed during exposure to the whale  
500 pinger. An increase in humpback whale swimming speed has been documented in response to  
501 whale watching boats [67, 68], but has not been reported in previous studies investigating  
502 behavioural responses to pingers. Boye et al. [67] found that whales took significantly shorter  
503 dives and increased their mean speed in response to boats, while similarly in our study some  
504 individual whales significantly decreased their dive time, while overall the whales  
505 significantly increased their speed. The increase in speed supports that humpback whales  
506 respond to the whale pinger sound. However, further investigation into the whales' behaviour  
507 underwater is needed to infer the effect of this reaction on entanglement mitigation.

508 Though similar previous studies were conducted during whale migration opposed to during  
509 the feeding season, results from this study were consistent with recent previous finding that  
510 there is no consistent, significant behavioural response of humpback whales to the whale  
511 pinger in terms of dive time, breathing rate, or directness [24, 25, 26]. There was also no



512 evidence for individual-specific responses in terms of breathing rate or directness, meaning  
513 we have no evidence that individuals reacted to the pinger significantly in terms of these  
514 variables. The received sound level may have been too low to elicit a detectable behavioural  
515 change in terms of these variables, which are behavioural reactions that can indicate the  
516 whale was disturbed or startled [28]. The humpback whales foraging in the study sites for this  
517 study are also regularly exposed to a lot of anthropogenic noise. Both locations host a high  
518 number of whale-watching vessels which target humpback whales primarily for their  
519 sightings, as well as industrial ports with associated development and maintenance noise and  
520 fishing vessels, cruise ships and cargo ships entering and exiting often. There are also  
521 commercial fishing grounds within the waters of both study sites. This may mean that many  
522 humpback whales in this area are generally habituated to anthropogenic noise and may not  
523 show behavioural changes that would indicate they are significantly disturbed or stressed.  
524 There was evidence for individual-specific responses in terms of dive time, even though there  
525 was no significant effect of whale pinger exposure on dive time overall. Some individuals  
526 significantly increased dive time during the *E* phase while other individuals significantly  
527 decreased. This could indicate that individuals just had variable significant reactions when  
528 the sound was introduced, which could depend on their behavioural state in the *PrE* phase, as  
529 suggested by Southall et al. [54]. It is also possible that individuals were just naturally  
530 changing between behavioural states from a long dive period to a short dive period and vice  
531 versa during the trials and for some individuals this happened to coincide with the *E* phase of  
532 the trial. Further investigation into humpback whale dive time response to low frequency  
533 sound, taking into account initial behavioural state and natural changes in behaviour, are  
534 necessary to conclude whether dive time changes are in response to the pinger or not.

535 We found no evidence for a significant effect of the seal scarer alarm on humpback whale  
536 speed, dive time, breathing rate or directness. In addition, we found no evidence that there

537 were any individual-specific responses to the seal scarer in terms of any of these variables.  
538 The seal scarer was measured as having a source level 52 dB louder than the whale pinger  
539 and due to this it was hypothesized the whales would have some reaction to the loud sound  
540 even though the frequency of the alarm is at the top or slightly above the estimated hearing  
541 range of the humpback whales [40]. Hearing in minke whales has more recently been  
542 modelled using CT scanning to show their range is higher than what is necessary for their  
543 communication [69], and they showed significant behavioural reactions to the seal scarer in  
544 Iceland [33], but we found no evidence that this is similar for the humpback whales. This is  
545 consistent with the findings of Henderson [70] who also concluded humpback whales do not  
546 react to high frequency pingers, though the pinger used in their study was 17-45 kHz higher  
547 in frequency than the device used in our study. It is possible that the frequency of the seal  
548 scarer was just too high for the humpback whales to hear the alarm well enough to exhibit a  
549 significant response, confirming that acoustic entanglement mitigation devices need to target  
550 the best-estimated hearing range of the whales. However, the surface feeding behavioural  
551 response remains unknown for the seal scarer since there was not enough surface feeding  
552 observed in the trials to analyze this.

553 The use of the whale pingers on the capelin purse seine net for one season provided a first  
554 insight into the use of the devices in a practical application in Iceland. A pair of whales  
555 entered the net fitted with the pingers from the bottom, before it had been closed, twice. Since  
556 the pingers were attached along the float line at the top of the net, this made sense that whales  
557 may still enter from the bottom, with the net extending down approximately 120m. Despite  
558 this, in both cases the whales were able to find their way out of the net through an  
559 approximately 100m wide (at the surface) opening to the side of the net without causing any  
560 damage and without further intervention methods from the captain (such as putting the boat  
561 into reverse to sink the float line), a very rare occurrence according to the captain and crew

562 onboard. This led to an overall positive view of the whale pingers and an increased interest in  
563 further trials for use in the Icelandic capelin purse seine fishery to prevent net damage.  
564 Suggestions for repositioning the pingers on the net could be considered in the future  
565 including attaching the pingers to the lead line at the bottom of the net or sewing specialized  
566 pockets for the pingers into the lower portion of the net (Hjörvar Hjálmarsson pers. comm.  
567 2018, Geir F. Zoega pers. comm. 2019). These observations also led to hypothesizing about  
568 the currently unknown directional hearing capabilities of humpback whales. Ten pingers were  
569 spaced approximately every 30-40m along the net measuring 450x120m in total. When the  
570 whales were inside the net there was an approximately 100m opening left at the surface by a  
571 single rope attaching the net end to the vessel, and the first pinger was attached to the net  
572 approximately 30m from the “bag” netting (the net that remains in the water to prevent fish  
573 from escaping as the they are hauled on board). This equals an estimated 150m pinger-less  
574 space, of which approximately 100m is the opening for the whales to escape through. If the  
575 pingers were truly aiding in the humpback whales finding this opening, as is being suggested  
576 based on the captain and crew’s experience with whales becoming encircled in the net for  
577 several years, this suggests that the whales were able to acoustically detect this 150m pinger-  
578 less space where the sound level was lower, and then find the 100m opening. Further trials  
579 and observation of whale pinger use on purse seine nets could provide more insight into this  
580 hypothesis.

581 Low frequency whale pingers may be a useful tool in preventing humpback whale  
582 entanglement and net damage occurring in their feeding grounds based primarily on the  
583 findings from this study that the whales reduced their surface feeding behaviour in response  
584 to the pinger and exited a purse seine net equipped with pingers without net damage or  
585 intervention. The whale pinger also had a significant effect on the swimming speed of the  
586 whales in this study, however the implications of this response in terms of entanglement

587 reduction are unknown. The fact that we observed no consistent behavioural reaction to the  
588 whale pinger in terms of dive time, breathing rate or directness suggests that the whale  
589 pingers do not elicit a stress response in humpback whales although whales increase  
590 swimming speed and reduce feeding. No significant reactions to the louder, high-frequency  
591 seal scarer alarm in terms of speed, dive time, breathing rate or directness were observed  
592 which suggests these alarms are not effective for humpback whales, though their feeding  
593 response to such an alarm requires further investigation. Though the whale pingers may be  
594 effective in mitigating entanglement, they should be used with caution until further  
595 information is known about the longer-term consequences of the reduction in feeding, and  
596 may be best suited only for certain, short-term applications in conjunction with other possible  
597 entanglement mitigation methods such as seasonal or area restrictions on fishing, and  
598 modified fishing gear.

## 599 **Acknowledgments**

600 A special thank you to Gentle Giants Whale Watching, the boat captains and the  
601 internship students at the Húsavík Research Centre who assisted with data collection. In  
602 addition, we greatly thank the captain and crew of Börkur for their participation in this study.

## 603 **References**

- 604 1. Moore MJ, Van Der Hoop J, Barco SG, Costidis AM, Gulland FM, Jepson PD, et al.  
605 Criteria and case definitions for serious injury and death of pinnipeds and cetaceans  
606 caused by anthropogenic trauma. *Dis Aquat Organ*. 2013; 103(3): 229–264.  
607 <https://doi.org/10.3354/dao02566>
- 608 2. Cassoff RM, Moore KM, McLellan WA, Barco SG, Rotstein DS, Moore MJ. Lethal  
609 entanglement in baleen whales. *Dis Aquat Organ*. 2011; 96(3): 175–185.  
610 <https://doi.org/10.3354/dao02385>
- 611 3. Knowlton AR, Kraus SD. Mortality and serious injury of northern right whales  
612 (*Eubalaena glacialis*) in the western North Atlantic Ocean. *J Cetacean Res Manag*.  
613 (Special Issue). 2001; 2: 193-208.
- 614 4. van der Hoop J, Corkeron P, Moore M. Entanglement is a costly life-history stage in  
615 large whales. *Ecol Evol*. 2017; 7(1): 92–106. <https://doi.org/10.1002/ece3.2615>

- 616 5. Moore MJ, van der Hoop JM. The Painful Side of Trap and Fixed Net Fisheries:  
617 Chronic Entanglement of Large Whales. *J Mar Biol.* 2012; 1–4.  
618 <https://doi.org/10.1155/2012/230653>
- 619 6. Robbins J, Knowlton AR, Landry S. Apparent survival of North Atlantic right whales  
620 after entanglement in fishing gear. *Biol Conserv.* 2015; 191: 421–427.  
621 <https://doi.org/10.1016/j.biocon.2015.07.023>
- 622 7. Volgenau L, Kraus SD, Lien J. The impact of entanglements on two substocks of the  
623 western North Atlantic humpback whale, *Megaptera novaeangliae*. *Can J Zool.* 1995;  
624 73(9): 1689–1698. <https://doi.org/10.1139/z95-201>
- 625 8. Johnson A, Salvador G, Kenney J, Robbins J, Kraus S, Landry SCP, et al. Fishing  
626 Gear Involved in Entanglements of Right and Humpback Whales. *Mar Mamm Sci.*  
627 2005; 21(4): 635–645
- 628 9. Gall SC, Thompson RC. The impact of debris on marine life. *Mar Pollut Bull.* 2015;  
629 92(1–2): 170–179. <https://doi.org/10.1016/j.marpolbul.2014.12.041>
- 630 10. Lien J, Aldrich D. Damage to the inshore fishing gear in Newfoundland and Labrador  
631 by whales and sharks during 1981. CAFSAC Marine Mammal Committee Meetings,  
632 St. John's NFL, 1982 May 18–19.
- 633 11. Lien J. A study of entrapment in fishing gear: Causes and Prevention. Progress Report  
634 1979 March 1.
- 635 12. Erbe C, McPherson C. Acoustic characterisation of bycatch mitigation pingers on  
636 shark control nets in Queensland, Australia. *Endanger Species Res.* 2012; 19(2): 109–  
637 121. <https://doi.org/10.3354/esr00467>
- 638 13. Kraus SD, Read AJ, Solow A, Baldwin K, Spradlin T, Anderson E, et al. Acoustic  
639 alarms reduce porpoise mortality. *Nature.* 1997; 388: 525
- 640 14. Jefferson TA, Curry BE. Acoustic methods of reducing or eliminating marine  
641 mammal-fishery interactions: Do they work? *Ocean Coast Manag.* 1996; 31(1): 41–  
642 70. [https://doi.org/10.1016/0964-5691\(95\)00049-6](https://doi.org/10.1016/0964-5691(95)00049-6)
- 643 15. Mangel JC, Alfaro-Shigueto J, Witt MJ, Hodgson DJ, Godley BJ. Using pingers to  
644 reduce bycatch of small cetaceans in Peru's small-scale driftnet fishery. *Oryx.* 2013;  
645 47(4): 595–606. <https://doi.org/10.1017/S0030605312000658>
- 646 16. Carretta JV, Barlow J, Enriquez L. Acoustic pingers eliminate beaked whale bycatch  
647 in a gill net fishery. *Mar Mamm Sci.* 2008; 24(4): 956–961.  
648 <https://doi.org/10.1111/j.1748-7692.2008.00218.x>
- 649 17. Barlow J, Cameron GA. Field experiments show that acoustic pingers reduce marine  
650 mammal bycatch in the field. *Mar Mamm Sci.* 2003; 19(2): 265–283.  
651 <https://doi.org/10.1111/j.1748-7692.2003.tb01108.x>
- 652 18. Kraus SD, Read AJ, Solow A, Baldwin K, Spradlin T, Anderson E, et al. Acoustic  
653 alarms reduce porpoise mortality. *Nature.* 1997; 388: 525
- 654 19. Erbe C, Wintner S, Dudley SFJ, Plön S. Revisiting acoustic deterrence devices: Long-  
655 term bycatch data from South Africa's bather protection nets. *Proc Mtgs Acoust.*  
656 2016; 27: 010025. <https://doi.org/10.1121/2.0000306>
- 657 20. Soto AB, Cagnazzi D, Everingham Y, Parra GJ, Noad M, Marsh H. Acoustic alarms  
658 elicit only subtle responses in the behaviour of tropical coastal dolphins in  
659 Queensland, Australia. *Endanger Species Res.* 2013; 20(3): 271–282.  
660 <https://doi.org/10.3354/esr00495>
- 661 21. Nowacek DP, Johnson MP, Tyack PL. North Atlantic right whales (*Eubalaena*  
662 *glacialis*) ignore ships but respond to alerting stimuli. *Proceedings of the Royal*  
663 *Society B: Biological Sciences.* 2004; 271(1536): 227–231.  
664 <https://doi.org/10.1098/rspb.2003.2570>
- 665 22. Todd S, Lien J, Verhulst A. Orientation of humpback whales (*Megaptera*

- 666        *novaeangliae*) and minke whales (*Balaenoptera acutorostrata*) to acoustic alarm  
667        devices designed to reduce entrapments in fishing gear. In: Thomas J, et al., editors.  
668        Marine Mammal Sensory Systems. Plenum Press: New York; 1992
- 669        23. Lagerquist B, Winsor M, Mate B. Testing the effectiveness of an acoustic deterrent  
670        for gray whales along the Oregon coast. Final Scientific Report. Oregon State  
671        University Marine Mammal Institute. U.S. Department of Energy; 2012 December.  
672        Available from: <https://ir.library.oregonstate.edu/downloads/05741s112>
- 673        24. Pirotta V, Slip D, Jonsen ID, Peddemors VM, Cato DH, Ross G, et al. Migrating  
674        humpback whales show no detectable response to whale alarms off Sydney, Australia.  
675        Endanger Species Res. 2016; 29(3): 201–209. <https://doi.org/10.3354/esr00712>
- 676        25. How J, Coughran DK, Smith JN, Harrison J, McMath J, Hebiton B, et al.  
677        Effectiveness of mitigation measures to reduce interactions between commercial  
678        fishing gear and whales. FRDC Project No 2013/03. In: Fisheries Research Report  
679        267. Science; 21 October 2015: 635–645.
- 680        26. Harcourt R, Pirotta V, Heller G, Peddemors V, Slip D. A whale alarm fails to deter  
681        migrating humpback whales: An empirical test. Endanger Species Res. 2014; 25(1):  
682        35–42. <https://doi.org/10.3354/esr00614>
- 683        27. Lien J, Barney W, Todd S, Seton R, Guzzwell J. Effects of Adding Sounds to Cod  
684        Traps on the Probability of Collisions by Humpback Whales. In: Thomas J, et al.,  
685        editors. Marine Mammal Sensory Systems. Plenum Press: New York; 1992
- 686        28. Nowacek DP, Thorne LH, Johnston DW, Tyack PL. Responses of cetaceans to  
687        anthropogenic noise. Mamm Rev. 2007; 37(2): 81-115
- 688        29. Dunlop RA, Noad MJ, Cato DH, Kniest E, Miller PJO, Smith JN, et al. Multivariate  
689        analysis of behavioural response experiments in humpback whales (*Megaptera*  
690        *novaeangliae*). J Exp Biol. 2013; 216(5): 759–770. <https://doi.org/10.1242/jeb.071498>
- 691        30. Fumunda. ‘Pingers’ show promise to keep whale away from nets. Alaska Journal of  
692        Commerce. 14 June 2012. Available from: [http://www.alaskajournal.com/business-](http://www.alaskajournal.com/business-and-finance/2012-06-14/pingers-show-promise-keep-whales-away-nets)  
693        [and-finance/2012-06-14/pingers-show-promise-keep-whales-away-nets](http://www.alaskajournal.com/business-and-finance/2012-06-14/pingers-show-promise-keep-whales-away-nets)
- 694        31. Welch L. Rebates help Alaska fishermen afford whale-repelling pingers. Anchorage  
695        Daily News. 31 May 2016. Available from:  
696        [https://www.adn.com/business/article/rebates-help-alaska-fishermen-afford-whale-](https://www.adn.com/business/article/rebates-help-alaska-fishermen-afford-whale-repelling-pingers/2016/05/07/)  
697        [repelling-pingers/2016/05/07/](https://www.adn.com/business/article/rebates-help-alaska-fishermen-afford-whale-repelling-pingers/2016/05/07/)
- 698        32. Taylor VJ, Johnston DW, Verboom WC. Acoustic harassment device (AHD) use in  
699        the aquaculture industry and implications for marine mammals. Proc. Symposium on  
700        Bio-sonar and Bioacoustics, Loughborough University, UK; 1997. Available from  
701        [https://www.researchgate.net/profile/Willem\\_Verboom2/publication/279424748\\_Aco](https://www.researchgate.net/profile/Willem_Verboom2/publication/279424748_Acoustic_Harassment_Device_AHD_use_in_the_aquaculture_industry_and_implications_for_marine_mammals/links/559266d108aed6ec4bf87c80/Acoustic-Harassment-Device-AHD-use-in-the-aquacult)  
702        [ustic\\_Harassment\\_Device\\_AHD\\_use\\_in\\_the\\_aquaculture\\_industry\\_and\\_implications](https://www.researchgate.net/profile/Willem_Verboom2/publication/279424748_Acoustic_Harassment_Device_AHD_use_in_the_aquaculture_industry_and_implications_for_marine_mammals/links/559266d108aed6ec4bf87c80/Acoustic-Harassment-Device-AHD-use-in-the-aquacult)  
703        [\\_for\\_marine\\_mammals/links/559266d108aed6ec4bf87c80/Acoustic-Harassment-](https://www.researchgate.net/profile/Willem_Verboom2/publication/279424748_Acoustic_Harassment_Device_AHD_use_in_the_aquaculture_industry_and_implications_for_marine_mammals/links/559266d108aed6ec4bf87c80/Acoustic-Harassment-Device-AHD-use-in-the-aquacult)  
704        [Device-AHD-use-in-the-aquacult](https://www.researchgate.net/profile/Willem_Verboom2/publication/279424748_Acoustic_Harassment_Device_AHD_use_in_the_aquaculture_industry_and_implications_for_marine_mammals/links/559266d108aed6ec4bf87c80/Acoustic-Harassment-Device-AHD-use-in-the-aquacult)
- 705        33. McGarry T, Boisseau O, Stephenson S, Compton R. Understanding the Effectiveness  
706        of Acoustic Deterrent Devices (ADDs) on Minke Whale (*Balaenoptera*  
707        *acutorostrata*), a Low Frequency Cetacean. Offshore Renewables Joint Industry  
708        Programme (ORJIP) Project 4, Phase 2. Carbon Trust Offshore Renewables Joint  
709        Industry; 2017 December. Available from:  
710        [https://www.carbontrust.com/media/675268/offshore-renewables-joint-industry-](https://www.carbontrust.com/media/675268/offshore-renewables-joint-industry-programme.pdf)  
711        [programme.pdf](https://www.carbontrust.com/media/675268/offshore-renewables-joint-industry-programme.pdf)
- 712        34. Brandt MJ, Höschle C, Diederichs A, Betke K, Matuschek R, Nehls G. Seal scarers as  
713        a tool to deter harbour porpoises from offshore construction sites. Mar Ecol Prog Ser.  
714        2013; 475: 291–302. <https://doi.org/10.3354/meps10100>
- 715        35. Morton AB, Symonds HK. Displacement of *Orcinus orca* (L.) by high amplitude

- 716 sound in British Columbia, Canada. ICES J Mar Sci. 2002; 59(1): 71–80.  
717 <https://doi.org/10.1006/jmsc.2001.1136>
- 718 36. Morton A. Occurrence, photo-identification and prey of pacific white-sided dolphins  
719 (*Lagenorhynchus obliquidens*) in the Broughton Archipelago, Canada 1984-1998. Mar  
720 Mamm Sci. 2000; 16(1): 80-93
- 721 37. Pike DG, Paxton CG, Gunnlaugsson T, Víkingsson GA. (2009). Trends in the  
722 distribution and abundance of cetaceans from aerial surveys in Icelandic coastal  
723 waters, 1986-2001. NAMMCO Sci Publ. 2009; 7: 1986–2001.  
724 <https://doi.org/10.7557/3.2710>
- 725 38. Magnúsdóttir EE, Rasmussen MH, Lammers MO, Svavarsson J. Humpback whale  
726 songs during winter in subarctic waters. Polar Biol. 2013; 37(3): 427–433.  
727 <https://doi.org/10.1007/s00300-014-1448-3>
- 728 39. Sigurjónsson J, Víkingsson GA. Seasonal abundance of the estimated food  
729 consumption by cetaceans in Icelandic and adjacent waters. J Northwest Atl Fish Sci.  
730 1997; 22: 271–287. <https://doi.org/10.2960/J.v22.a20>
- 731 40. Houser DS, Helweg DA, Moore PWB. A Bandpass filter-bank model of auditory  
732 sensitivity in the humpback whale. Aquat Mamm. 2001; 27(2): 82–91.  
733 <https://doi.org/10.1103/PhysRevLett.89.180402>
- 734 41. Todd SK. Acoustical properties of fishing gear; possible relationships to baleen whale  
735 entrapment. B.Sc.Hons Thesis, Memorial University of Newfoundland. 1991.  
736 Available from: <https://research.library.mun.ca/5875/>
- 737 42. Statistics Iceland. The fishing fleet by region and type of vessels 1999-2018 [cited  
738 2019 Aug 15]. Available from:  
739 [https://px.hagstofa.is/pxen/pxweb/en/Atvinnuvegir/Atvinnuvegir\\_sjavarutvegur\\_skip/SJA05001.px/table/tableViewLayout1/?rxid=23a75af5-f604-47a5-b3e9-62b122a29b55](https://px.hagstofa.is/pxen/pxweb/en/Atvinnuvegir/Atvinnuvegir_sjavarutvegur_skip/SJA05001.px/table/tableViewLayout1/?rxid=23a75af5-f604-47a5-b3e9-62b122a29b55)
- 741 43. Hafrannsóknastofnun. Fisheries overview. Hafrannsóknastofnun, Reykjavik; 2018 June  
742 13. Available from:  
743 [https://www.hafogvatn.is/static/files/Veidiradgjof/2018/fishoverview\\_2018.pdf](https://www.hafogvatn.is/static/files/Veidiradgjof/2018/fishoverview_2018.pdf)
- 744 44. Young, M. Marine animal entanglements in mussel aquaculture gear: Documented  
745 cases from mussel farming regions of the world including first-hand accounts from  
746 Iceland. MRM Thesis, University Center of the Westfjords. 2015. Available from:  
747 <https://skemman.is/handle/1946/22522>
- 748 45. Government of Iceland. Aquaculture. n.d. Ministry of Industries and Innovation.  
749 [cited 16 July 2019]. Available from: <https://www.government.is/topics/business-and-industry/fisheries-in-iceland/aquaculture/>
- 751 46. Basran CJ, Bertulli CG, Cecchetti A, Rasmussen MH, Whittaker M, Robbins J. First  
752 estimates of entanglement rate of humpback whales *Megaptera novaeangliae*  
753 observed in coastal Icelandic waters. Endanger Species Res. 2019; 38: 67–77.  
754 <https://doi.org/10.3354/ESR00936>
- 755 47. Basran C. Scar-based analysis and eyewitness accounts of entanglement of humpback  
756 whales (*Megaptera novaeangliae*) in fishing gear in Iceland. MRM Thesis, University  
757 Center of the Westfjords. 2014. Available from:  
758 <https://skemman.is/handle/1946/19615>
- 759 48. Víkingsson GA, Olafsdóttir D, Gunnlaugsson Th. Iceland: Progress report on  
760 cetacean research, April 2003 to April 2004, with statistical data for the calendar year  
761 2003. Marine Research Institute, Reykjavik. 2004. Document SC/ 56/ Prog. Rep.  
762 Available from: <http://nammco.wpengine.com/wp-content/uploads/2016/08/Annual-Report-2005.pdf>
- 763  
764 49. Víkingsson GA, Olafsdóttir D. Iceland: Progress report on cetacean research, April  
765 2002 to March 2003, with statistical data for the calendar year 2002. Marine Research

- 766 Institute, Reykjavik. 2003. Document SC/55/Prog.Rep. Available from:  
767 <http://nammco.wpengine.com/wp-content/uploads/2016/08/Annual-Report-2004.pdf>
- 768 50. Einarsson N. From good to eat to good to watch: whale watching, adaptation and  
769 change in Icelandic fishing communities. *Polar Res.* 2009; 28: 129–138.
- 770 51. Stefánsson U, Thórdardóttir Th, Ólafsson J. Comparison of seasonal oxygen cycles  
771 and primary production in the Faxaflói region, southwest Iceland. *Deep Sea Res.*  
772 1987; 34: 725–739.
- 773 52. Stefánsson U, Guðmundsson G. The freshwater regime of Faxaflói, southwest  
774 Iceland, and its relationship to meteorological variables. *Estuar Coast Mar Sci.* 1978;  
775 6: 535–551
- 776 53. Carlson, C. A Review of Whale Watch Guidelines and Regulations Around the  
777 World. IWC. 2009; 2008: 1–149
- 778 54. Southall B L, DeRuiter SL, Friedlaender A, Stimpert AK, Goldbogen JA, Hazen E, et  
779 al. Behavioral responses of individual blue whales (*Balaenoptera musculus*) to mid-  
780 frequency military sonar. *J Exp Biol.* 2019; 222(5): jeb190637.  
781 <https://doi.org/10.1242/jeb.190637>
- 782 55. Zuur AF, Ieno EN, Walker NJ, Saveliev AA, Smith GM. *Mixed Effects Models and*  
783 *Extensions in Ecology with R.* Springer Science+Business Media; 2009.
- 784 56. Pinheiro J, Bates D, DebRoy S, Sarkar D, R Core Team. *\_nlme: linear and nonlinear*  
785 *mixed effects models.* R package version 3.1-117. 2014. Available from: [http:](http://CRAN.R-project.org/package=nlme)  
786 [//CRAN.R-project.org/package=nlme](http://CRAN.R-project.org/package=nlme)
- 787 57. Hothorn T, Bretz F, Westfall P. Simultaneous Inference in General Parametric Models.  
788 *Biom J.* 2008; 50(3): 346-363
- 789 58. Bates D, Maechler M, Bolker B, Walker S. *Fitting Linear Mixed-Effects Models*  
790 *Using lme4.* *J Stat Softw.* 2015; 67(1): 1-48. [doi:10.18637/jss.v067.i01](https://doi.org/10.18637/jss.v067.i01)
- 791 59. Sivle LD, Kvadsheim PH, Curé C, Isojunno S, Wensveen PJ, Lam FPA, et al.  
792 Severity of expert-identified behavioural responses of humpback whale, minke whale,  
793 and northern bottlenose whale to naval sonar. *Aquat Mamm.* 2015; 41(4): 469–502.  
794 <https://doi.org/10.1578/AM.41.4.2015.469>
- 795 60. Blair HB, Merchant ND, Friedlaender AS, Wiley DN, Parks SE. Evidence for ship  
796 noise impacts on humpback whale foraging behaviour. *Biol Lett.* 2016; 12(8):  
797 20160005
- 798 61. Ovide BG. Using tag data to assess behaviour, vocal sounds, boat noise and potential  
799 effects on humpback whales (*Megaptera novaeangliae*) in response to whale  
800 watching boats in Skjálfandi Bay (Húsavík), Iceland. MRM Thesis, University  
801 Center of the Westfjords. 2017. Available from: <https://skemman.is/handle/1946/28667>
- 802 62. Johnson JH, Wolman AA. The Humpback Whale, *Megaptera novaeangliae*. *Mar Ecol*  
803 *Prog Ser.* 1984; 46(4): 30-37.
- 804 63. Whalberg M, Westerberg H. Hearing in fish and their reactions to sounds from  
805 offshore wind farms. *Mar Ecol Prog Ser.* 2005; 288: 295-309.
- 806 64. Friedlaender AS, Tyson RB, Stimpert AK, Read AJ, Nowacek DP. Extreme diel  
807 variation in the feeding behavior of humpback whales along the western Antarctic  
808 Peninsula during autumn. *Mar Ecol Prog Ser.* 2013; 494: 281–289.  
809 <https://doi.org/10.3354/meps10541>
- 810 65. Perkins JS, Beamish PC. Net Entanglements of Baleen Whales in the Inshore Fishery  
811 of Newfoundland. *J Fish Res Board Can.* 1979; 36(5): 521-528.
- 812 66. Butterworth A, Clegg I, Bass C. *Untangled – Marine debris: a global picture of the*  
813 *impact on animal welfare and of animal-focused solutions.* London: World Society for  
814 the Protection of Animals; 2012. Available from:  
815 [https://www.researchgate.net/publication/263444260\\_Marine\\_debris\\_a\\_global\\_picture\\_of](https://www.researchgate.net/publication/263444260_Marine_debris_a_global_picture_of)



- 816 [the impact on animal welfare and of animal-focused solutions](#)
- 817 67. Boye TK, Simon M, Madsen PT. Habitat use of humpback whales in Godthaabsfjord,
- 818 West Greenland, with implications for commercial exploitation. *J Mar Biol Assoc*
- 819 UK. 2010; 90(8): 1529-1538
- 820 68. Schaffar A, Madon B, Garrigue C, Canstantine R. Behavioural effects of whale-
- 821 watching activities on an Endangered population of humpback whales wintering in
- 822 New Caledonia. *Endang Species Res.* 2013; 19: 245-254
- 823 69. Tubelli AA, Zosuls A, Ketten DR, Yamato M, Mountain DC. A prediction of the
- 824 minke whale (*Balaenoptera acutorostrata*) middle-ear transfer function. *J Acoust Soc*
- 825 Am. 2012;132(5):3263–3272. doi:10.1121/1.4756950
- 826 70. Baleen whale responses to a high frequency active pinger: Implications for upper
- 827 frequency hearing limits. *J Acoust Soc Am.* 2016; 140: 3412.
- 828 <https://doi.org/10.1121/1.4970965>
- 829

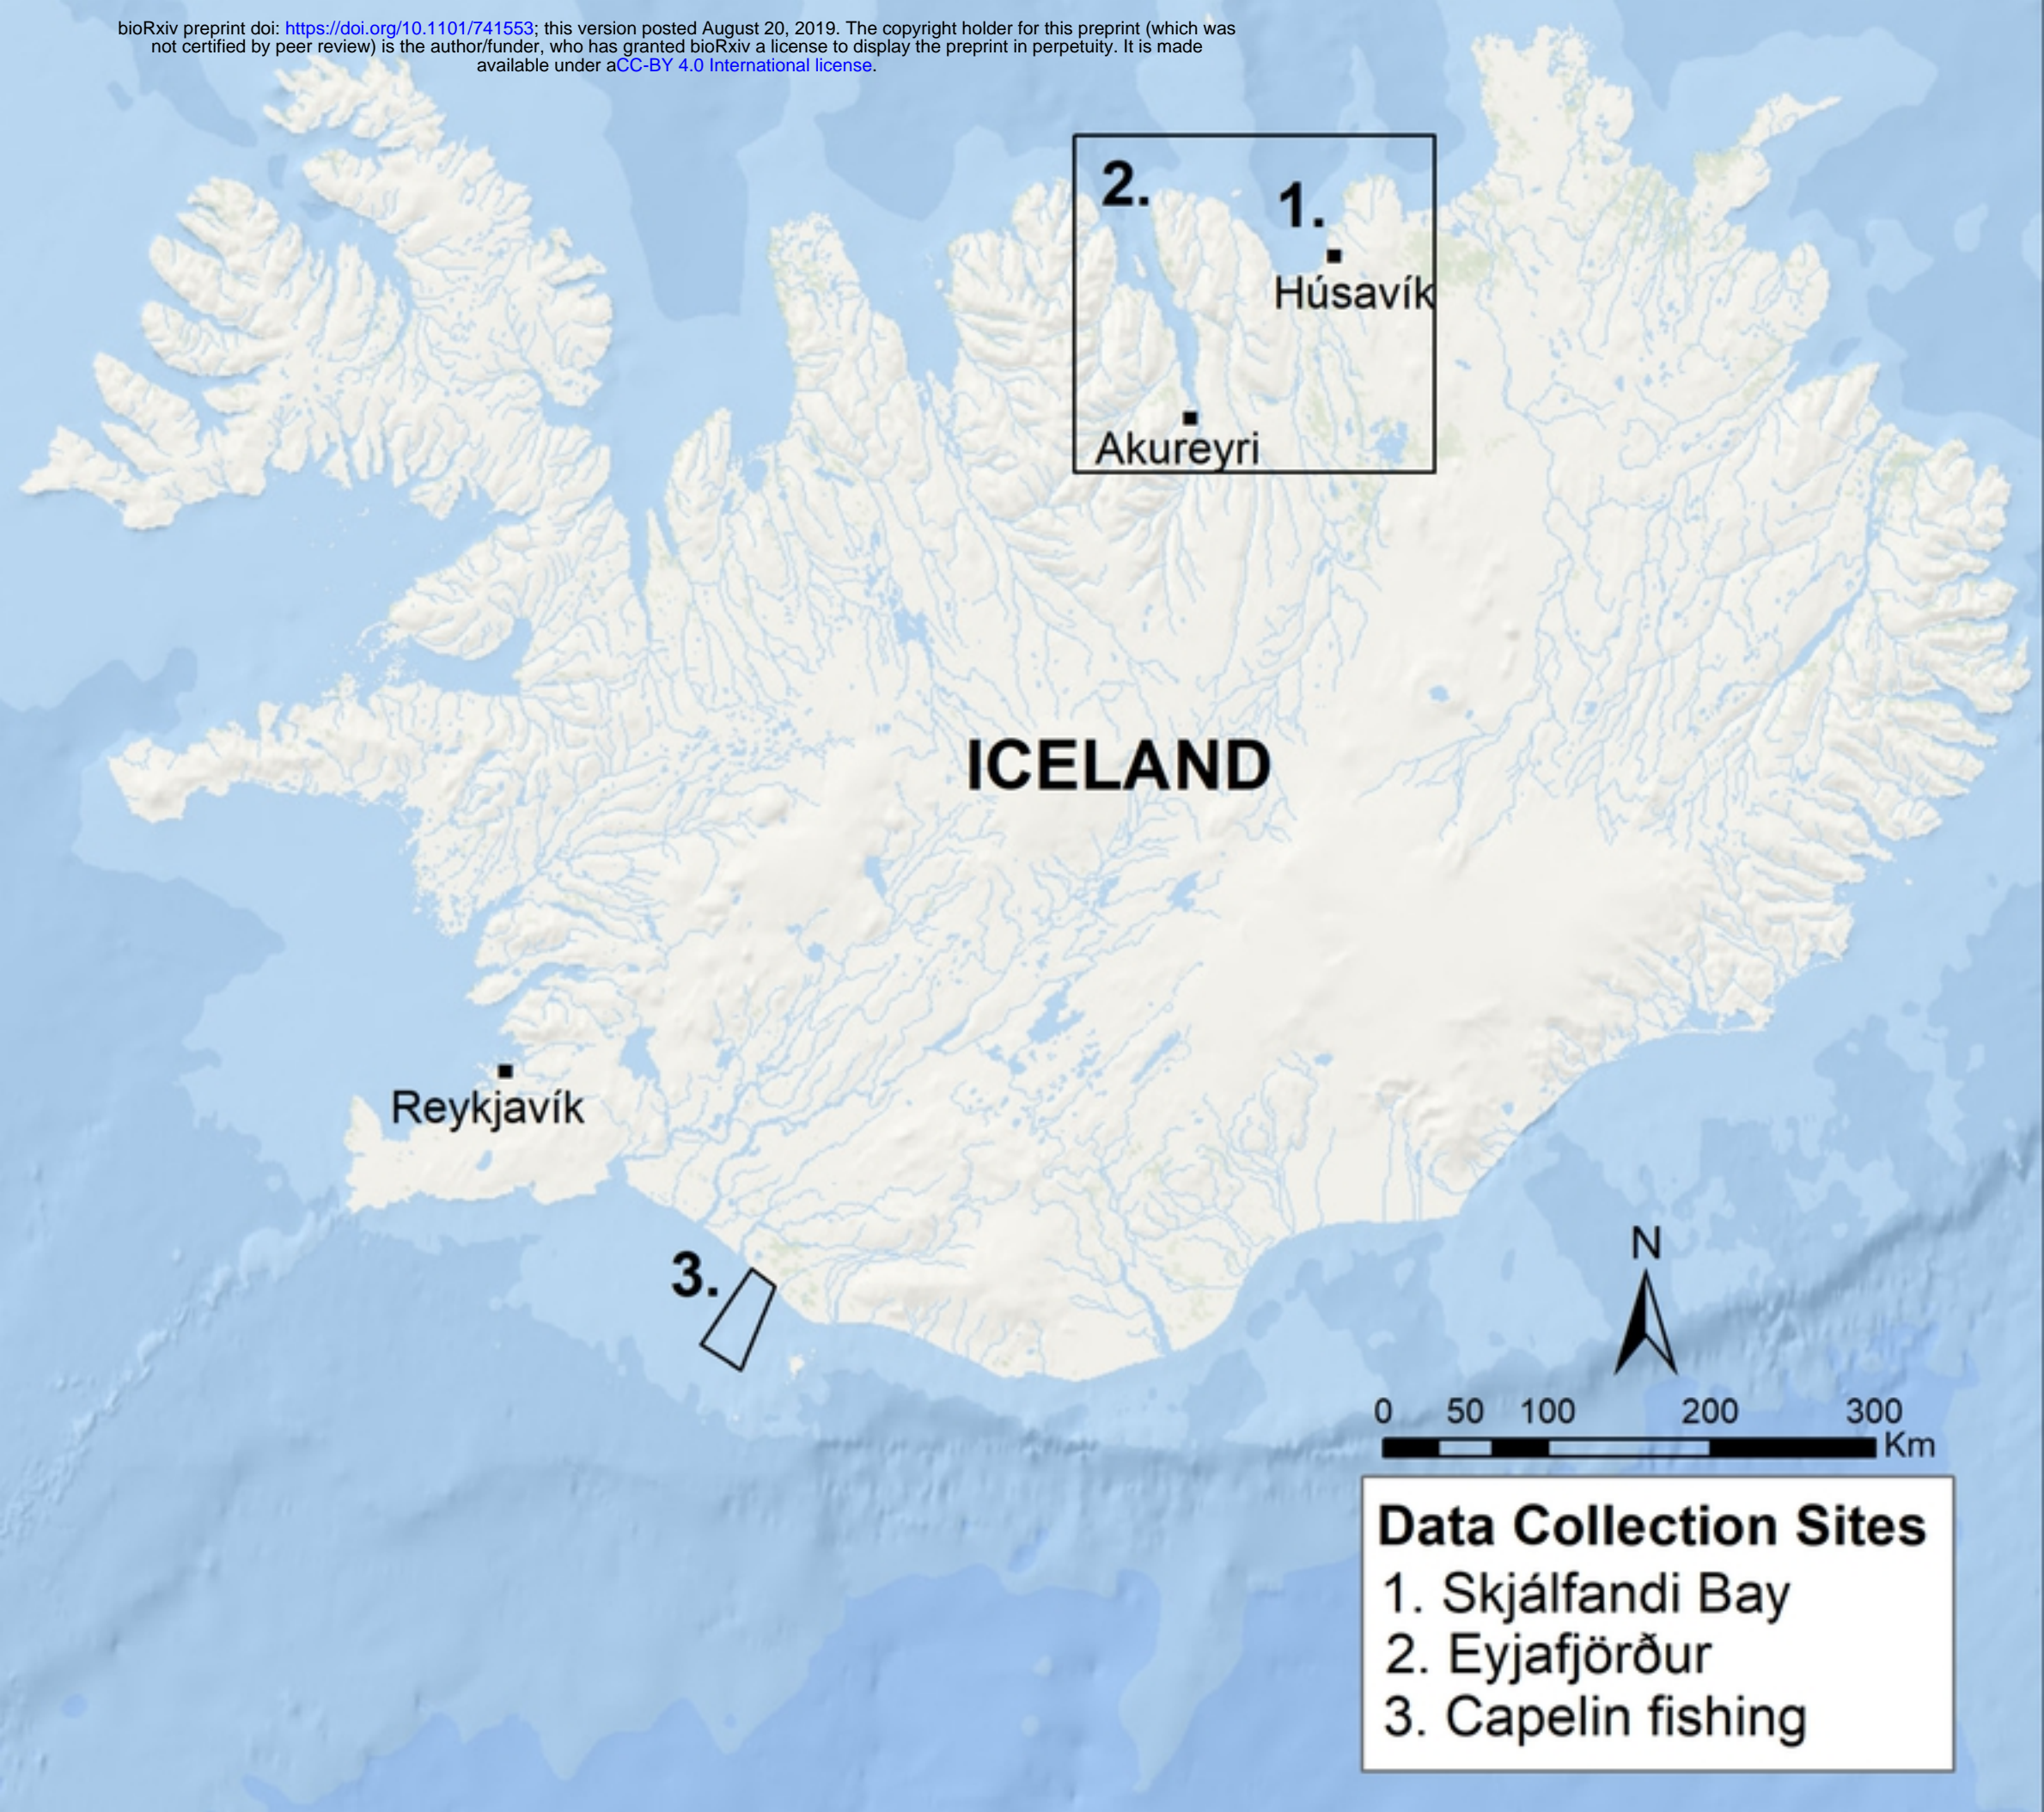

Figure

bioRxiv preprint doi: <https://doi.org/10.1101/741553>; this version posted August 20, 2019. The copyright holder for this preprint (which was not certified by peer review) is the author/funder, who has granted bioRxiv a license to display the preprint in perpetuity. It is made available under a [CC-BY 4.0 International license](#).

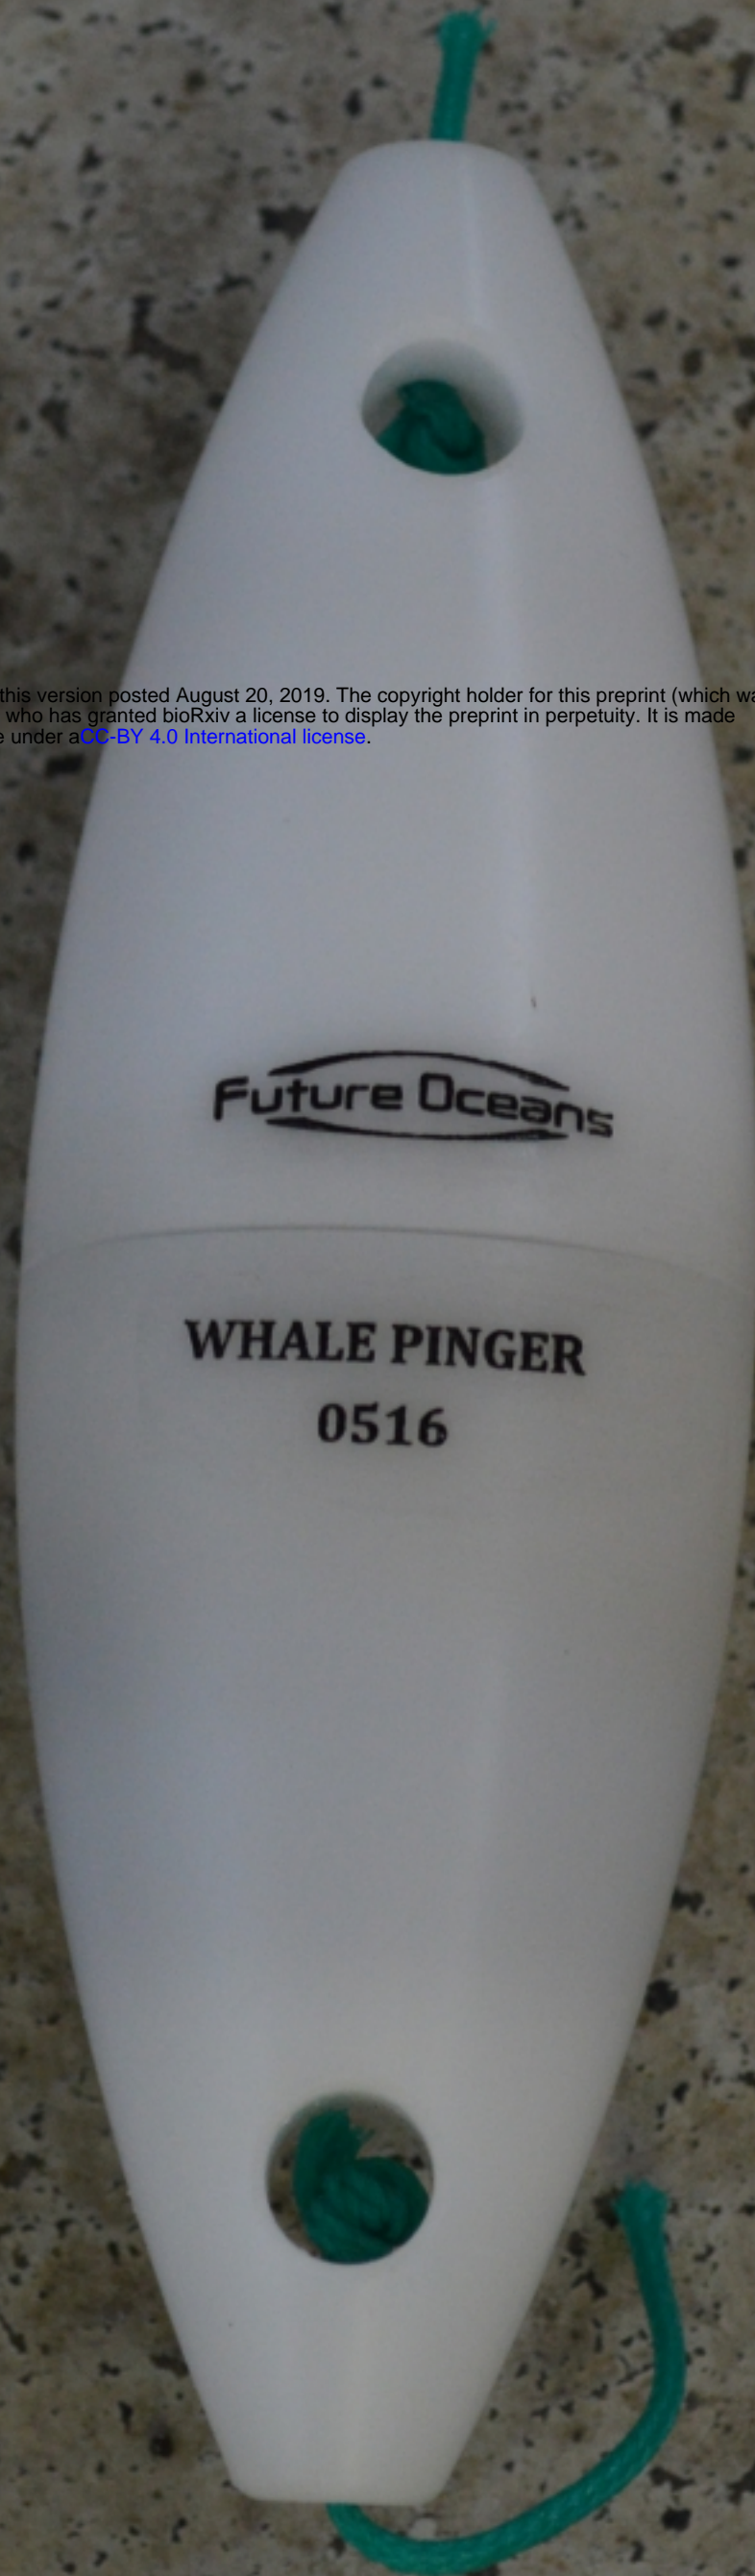

Figure

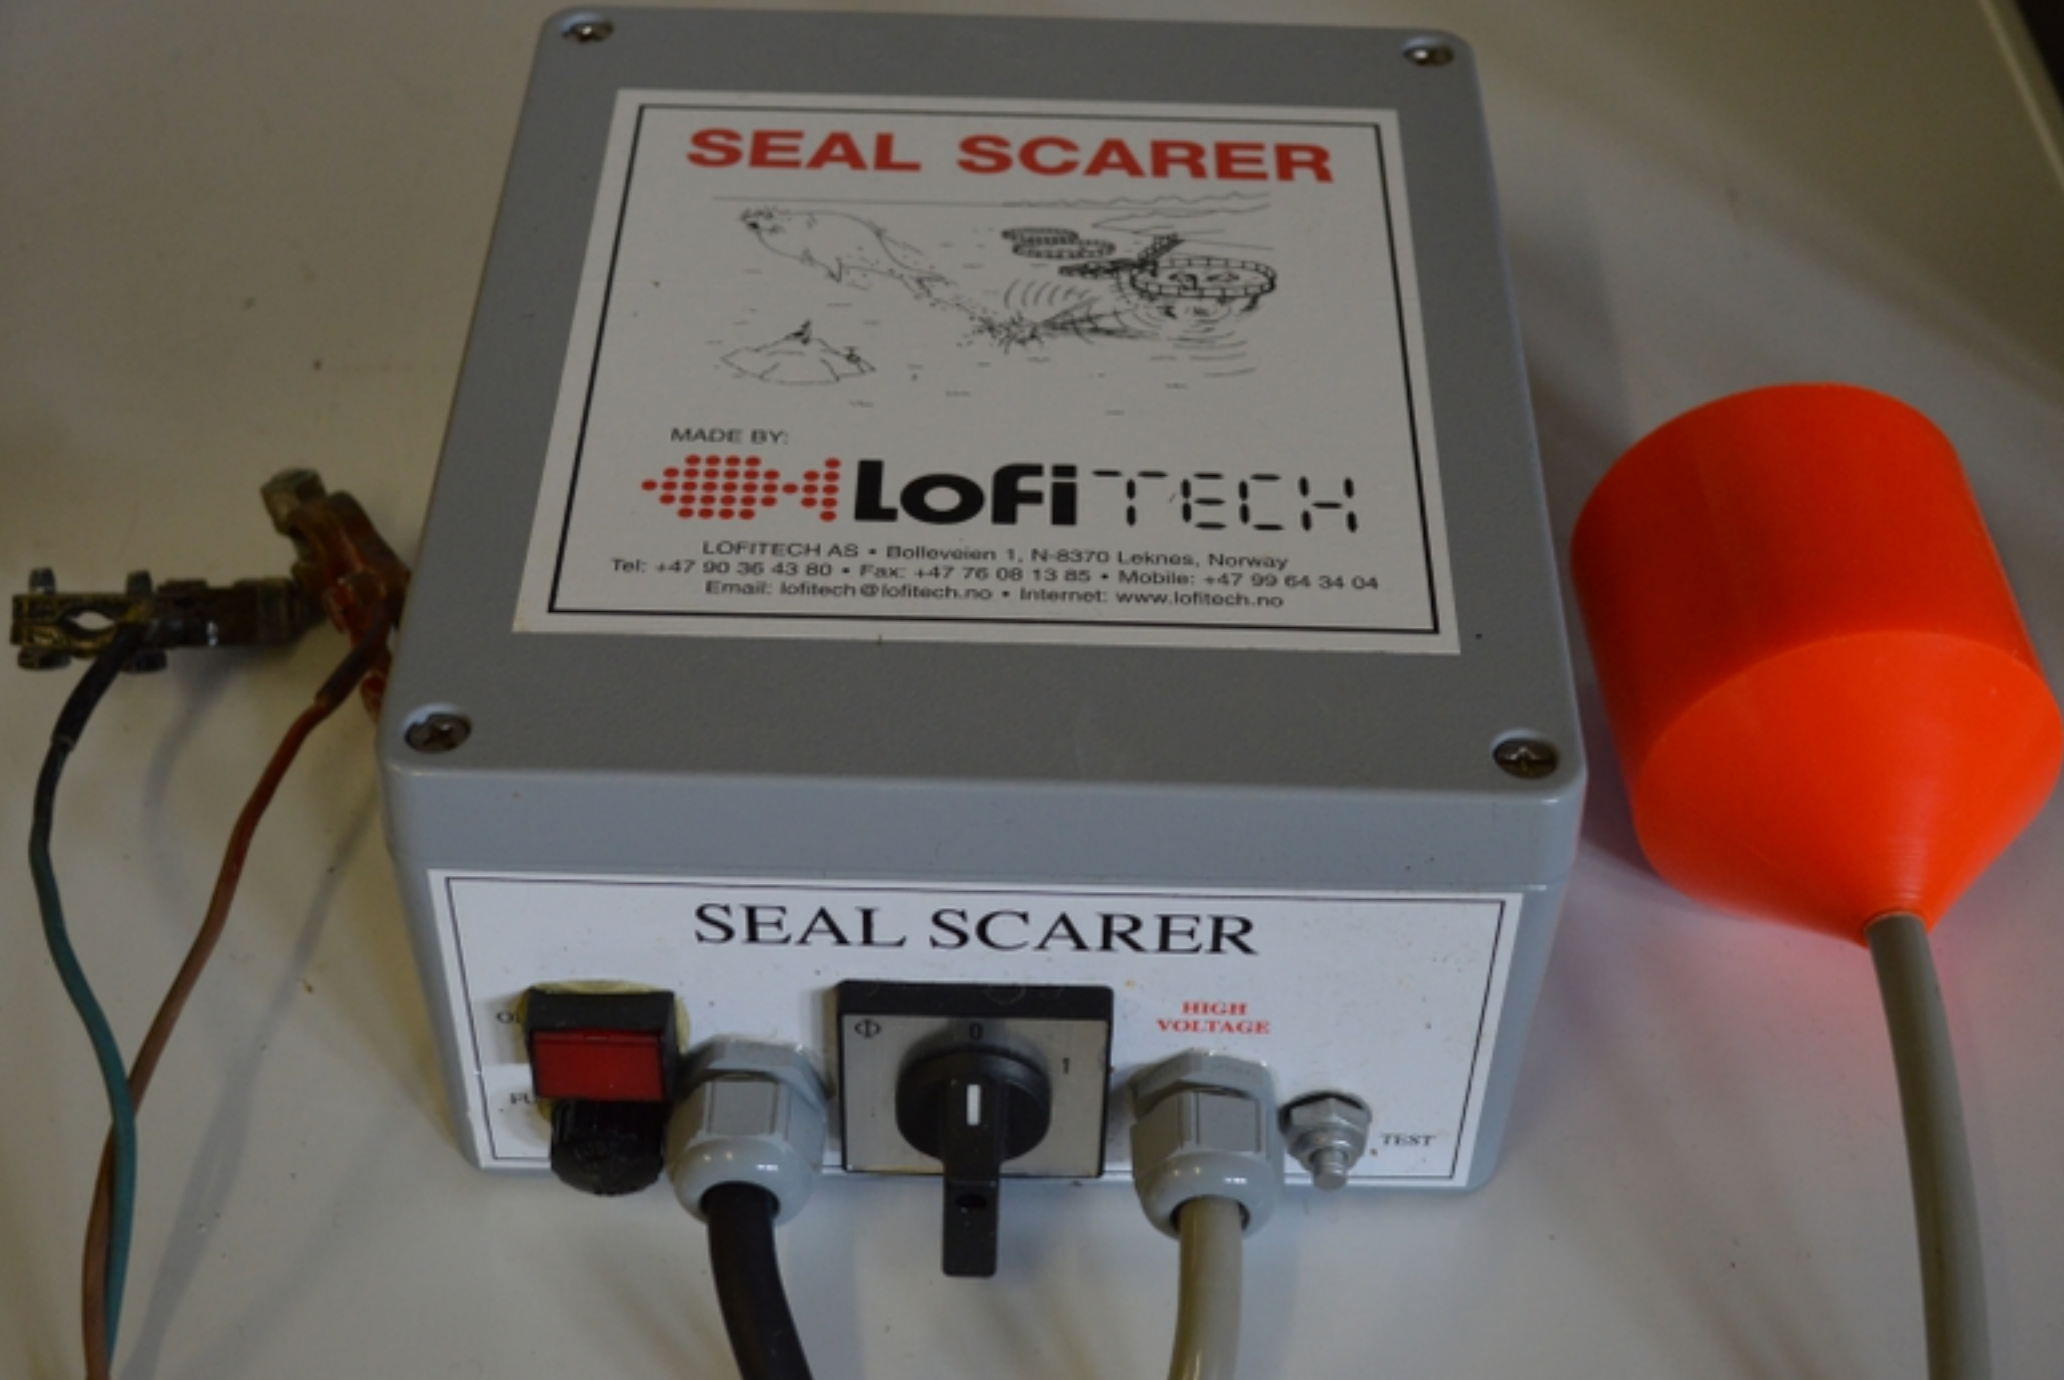

Figure

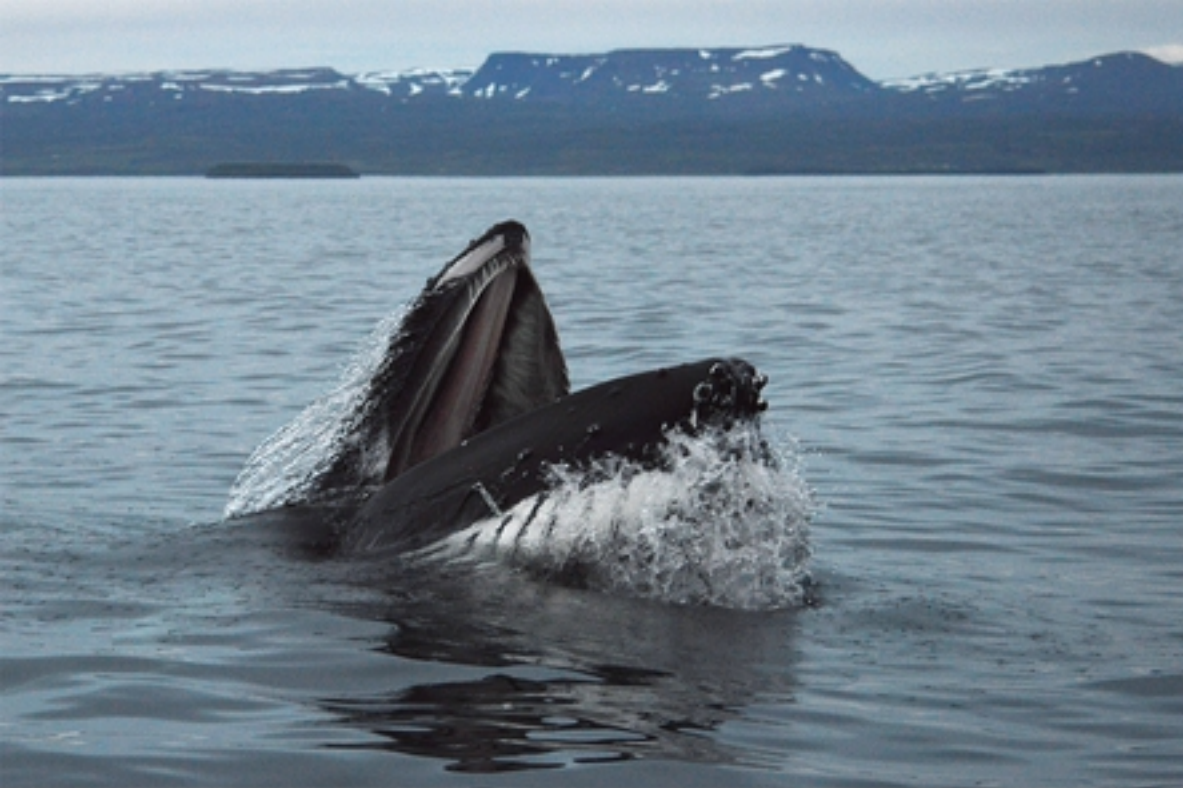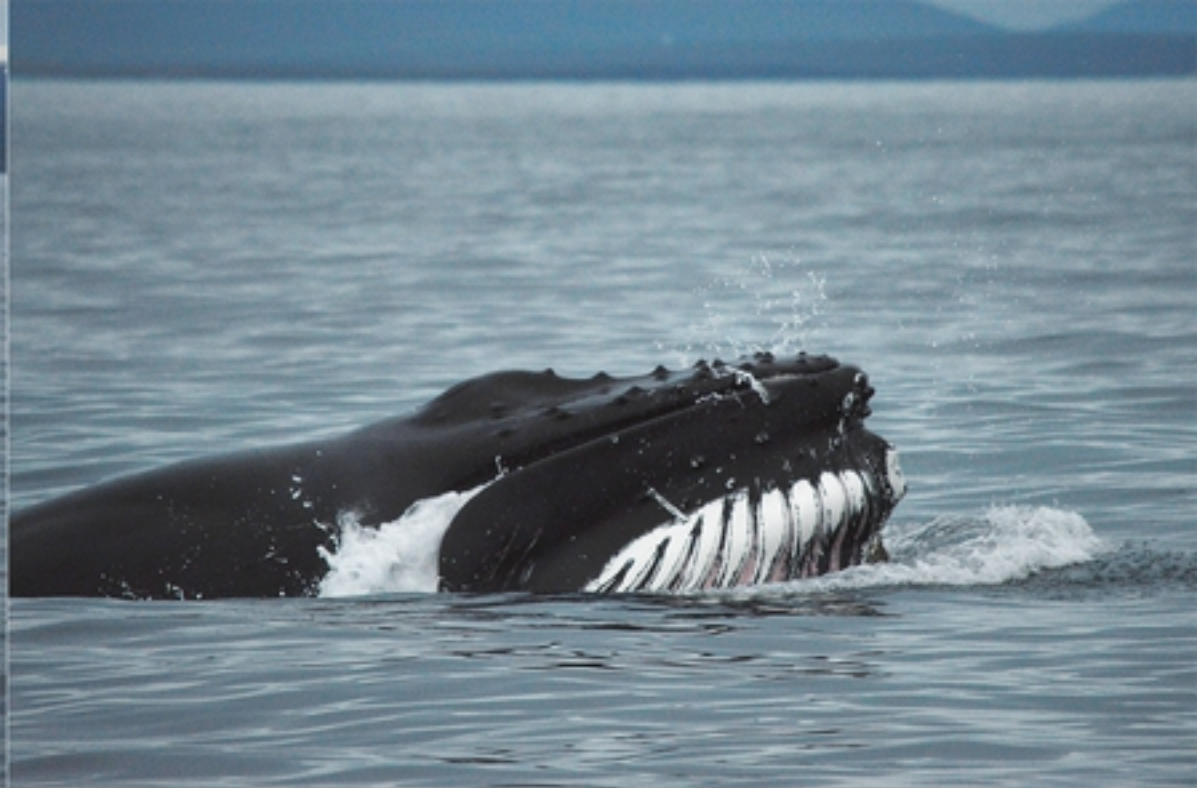

Figure

| Individual          | ID photograph                                                                       | Location | Device (trial #) | Data           |
|---------------------|-------------------------------------------------------------------------------------|----------|------------------|----------------|
| Mn452-Odin          |     | SB       | WP2              | B, DI, D, S, F |
| Mn422-Constellation |    | SB       | WP3              | B, DI, D, S, F |
| Mn425-Excalibur     |    | SB       | WP4              | B, DI, D, S    |
| Mn497-Mystery       |    | SB       | WP5              | B, D, F        |
| Mn690-Remoladi      |   | SB       | WP6              | B, D*          |
| Mn598-OneEye        |  | SB       | WP7              | B, DI, D*, S*  |
| Mn215-Frangia       |  | SB       | WP9              | B, DI, D, S, F |
| EF-unknown          | Poor quality fluke image                                                            | EF       | WP10             | B, DI, D, S, F |
| Mn519-Fleur         |  | SB       | WP11             | B, DI, D, S    |
| Mn597-Cosima        |  | SB       | SS1              | B, DI, D, S    |
| Mn447-Triplet       |  | SB       | SS2              | B, DI, D, S    |
| Mn512-CaptainHook   |  | SB       | SS3              | B, DI, D, S    |
| Mn674-Sully         |  | SB       | SS4              | B, D, S        |
| Mn750-Chambao       |  | SB       | SS5              | B, DI, D, S    |
| Mn570-Evero         |  | SB       | SS6              | B, DI, D, S    |
| Mn597-Cosima        | See SS1                                                                             | SB       | SS7              | B, DI, D, S    |

bioRxiv preprint doi: <https://doi.org/10.1101/741553>; this version posted August 20, 2019. The copyright holder for this preprint (which was not certified by peer review) is the author/funder, who has granted bioRxiv a license to display the preprint in perpetuity. It is made available under aCC-BY 4.0 International license.

Figure

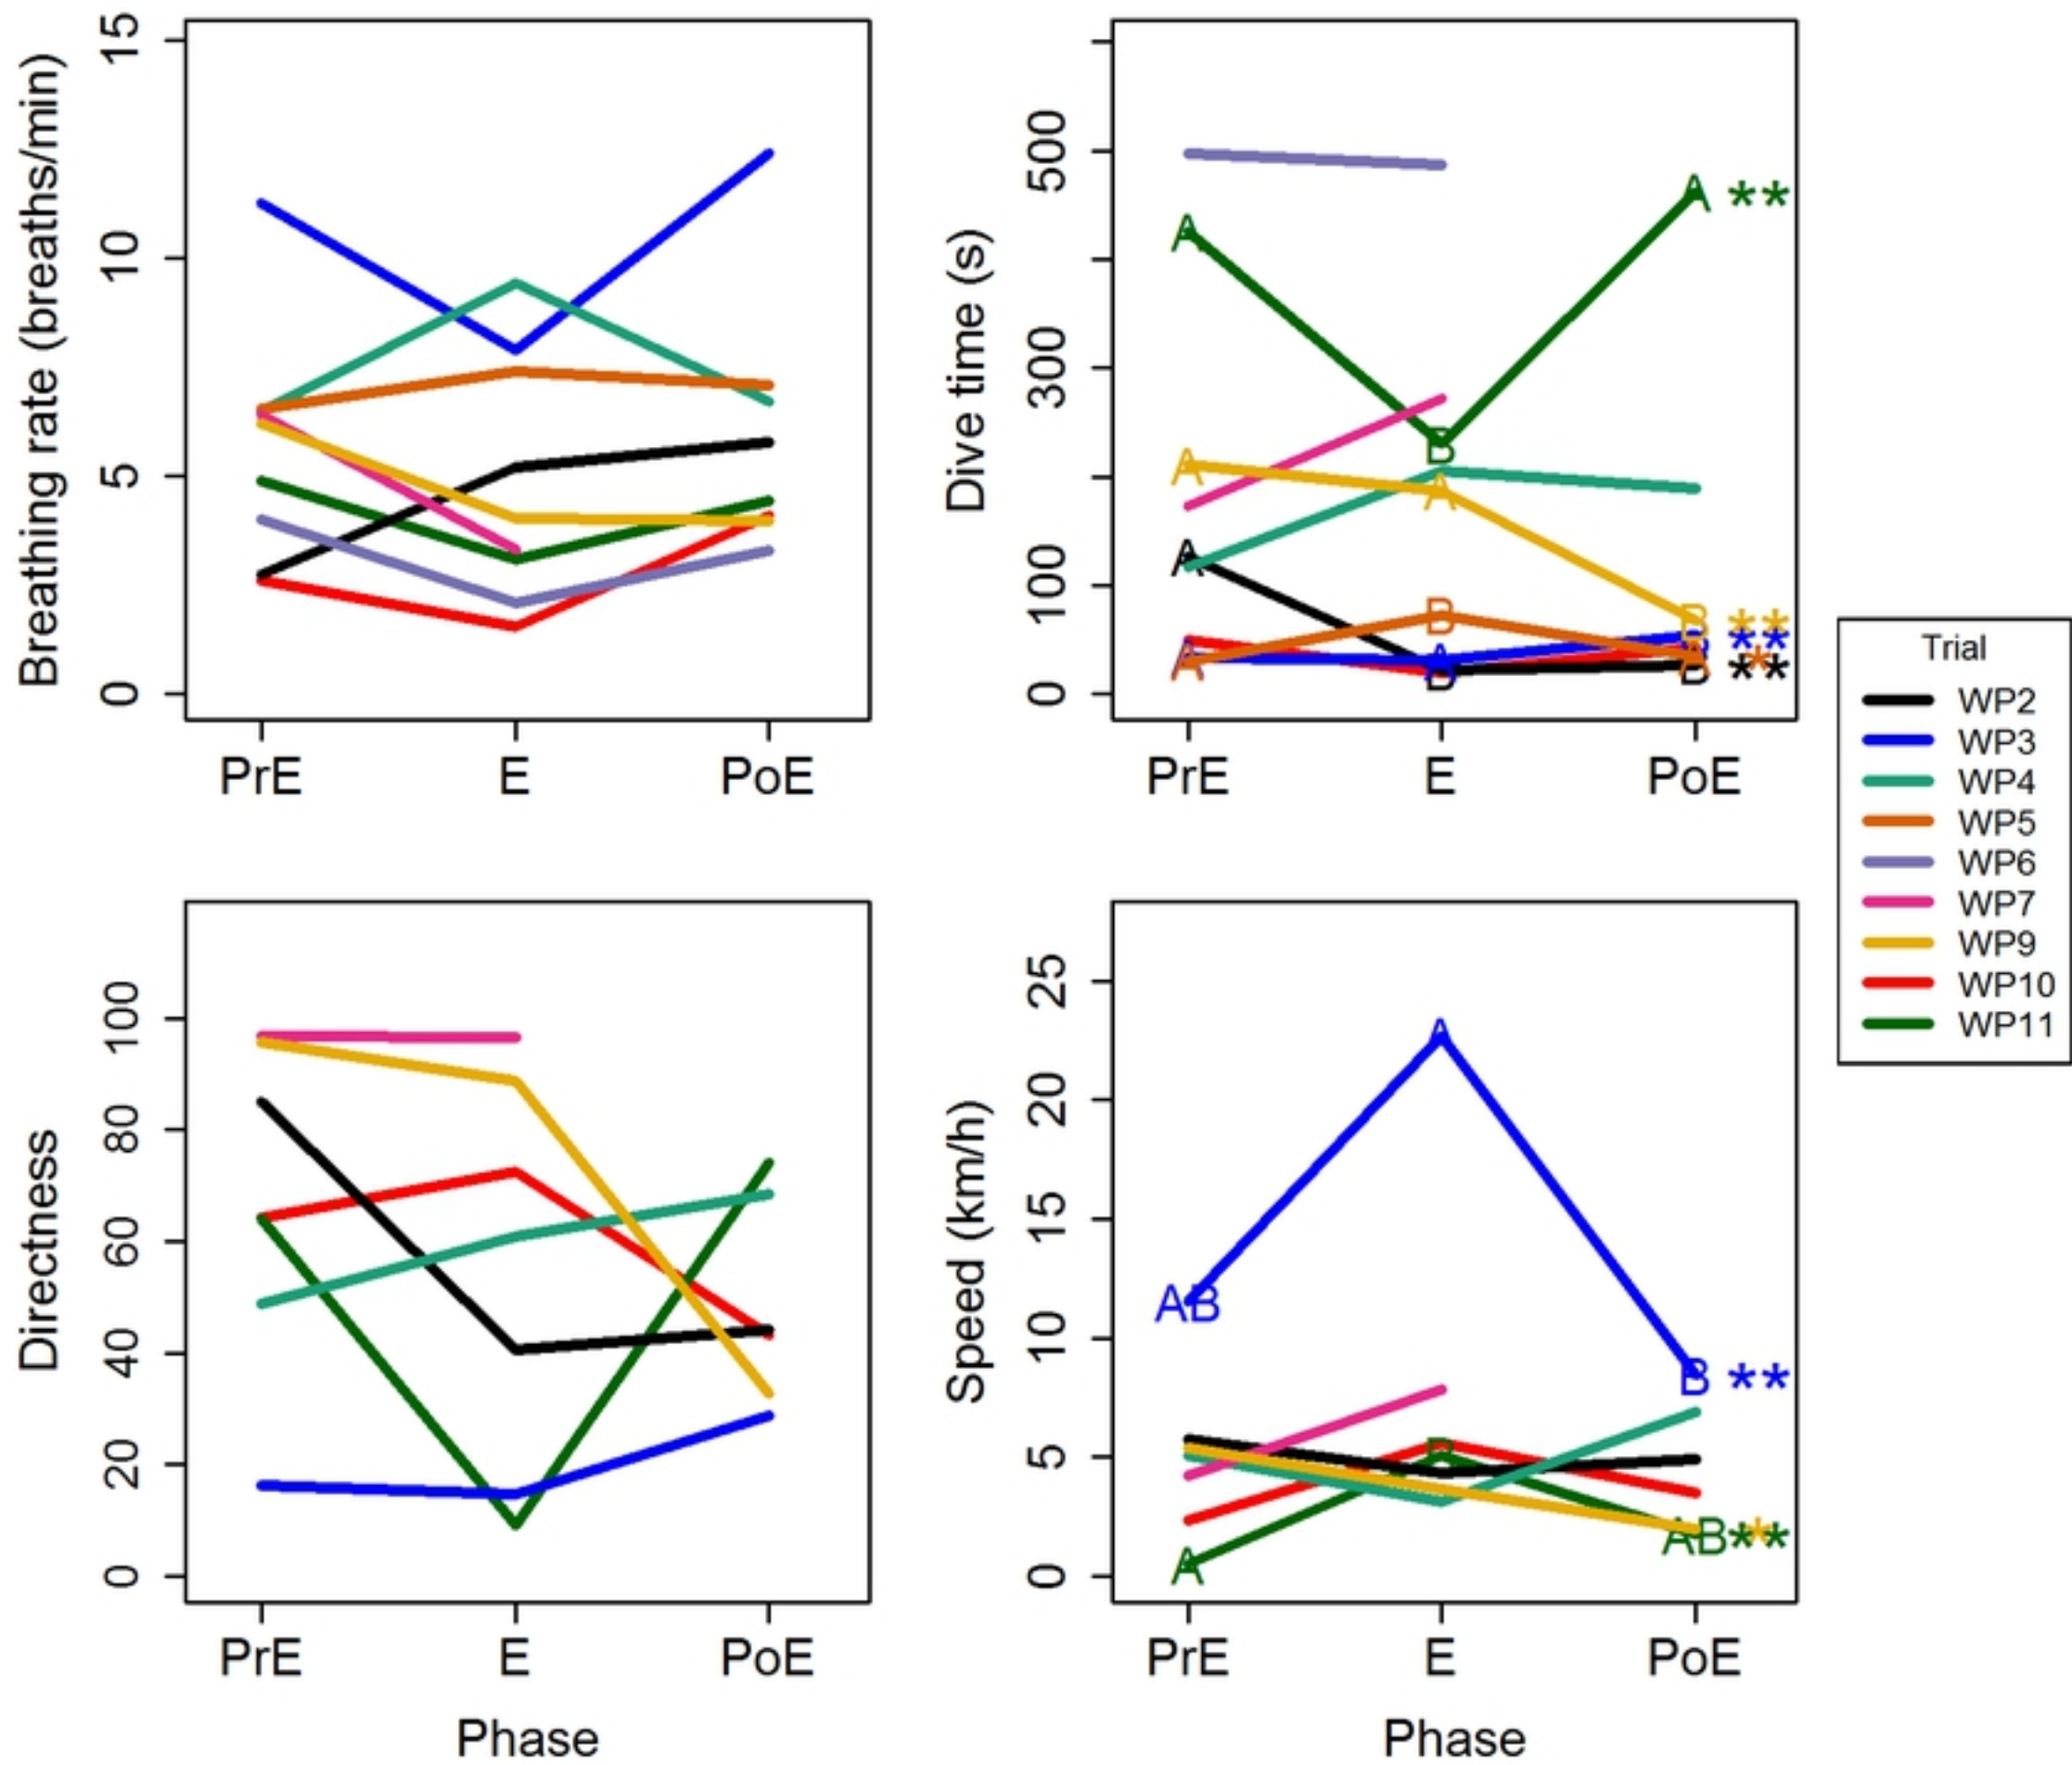

Figure

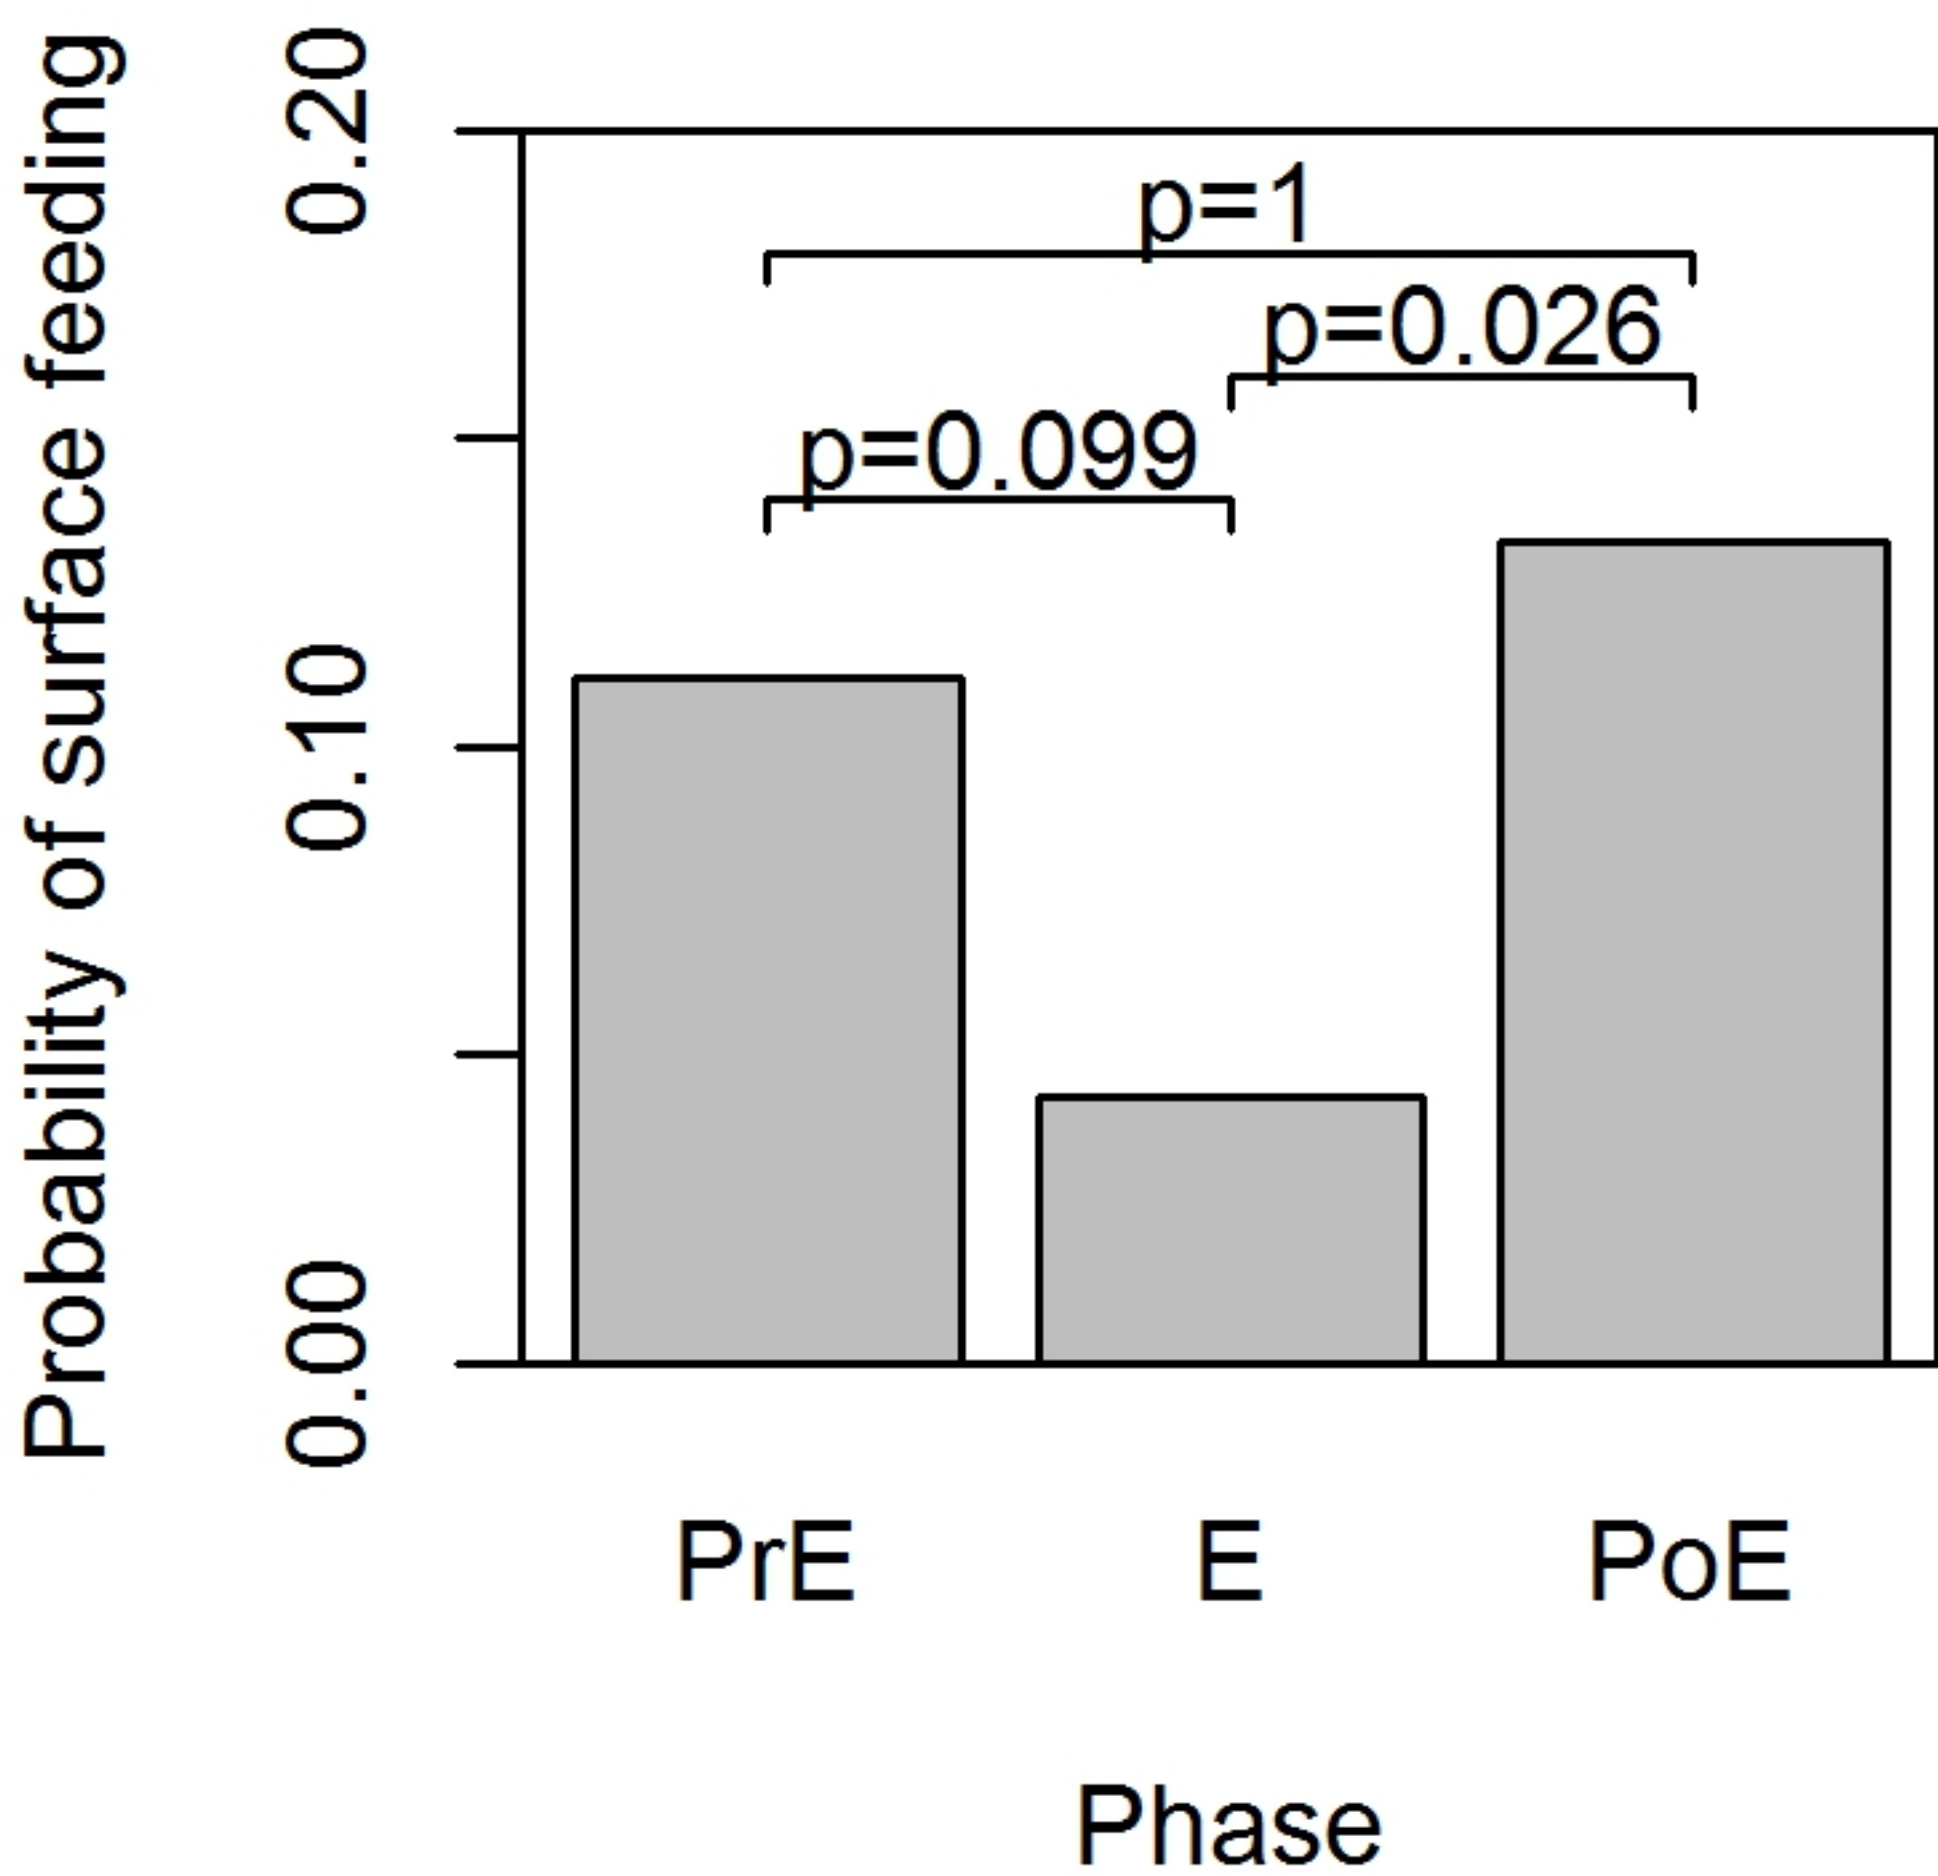

Figure



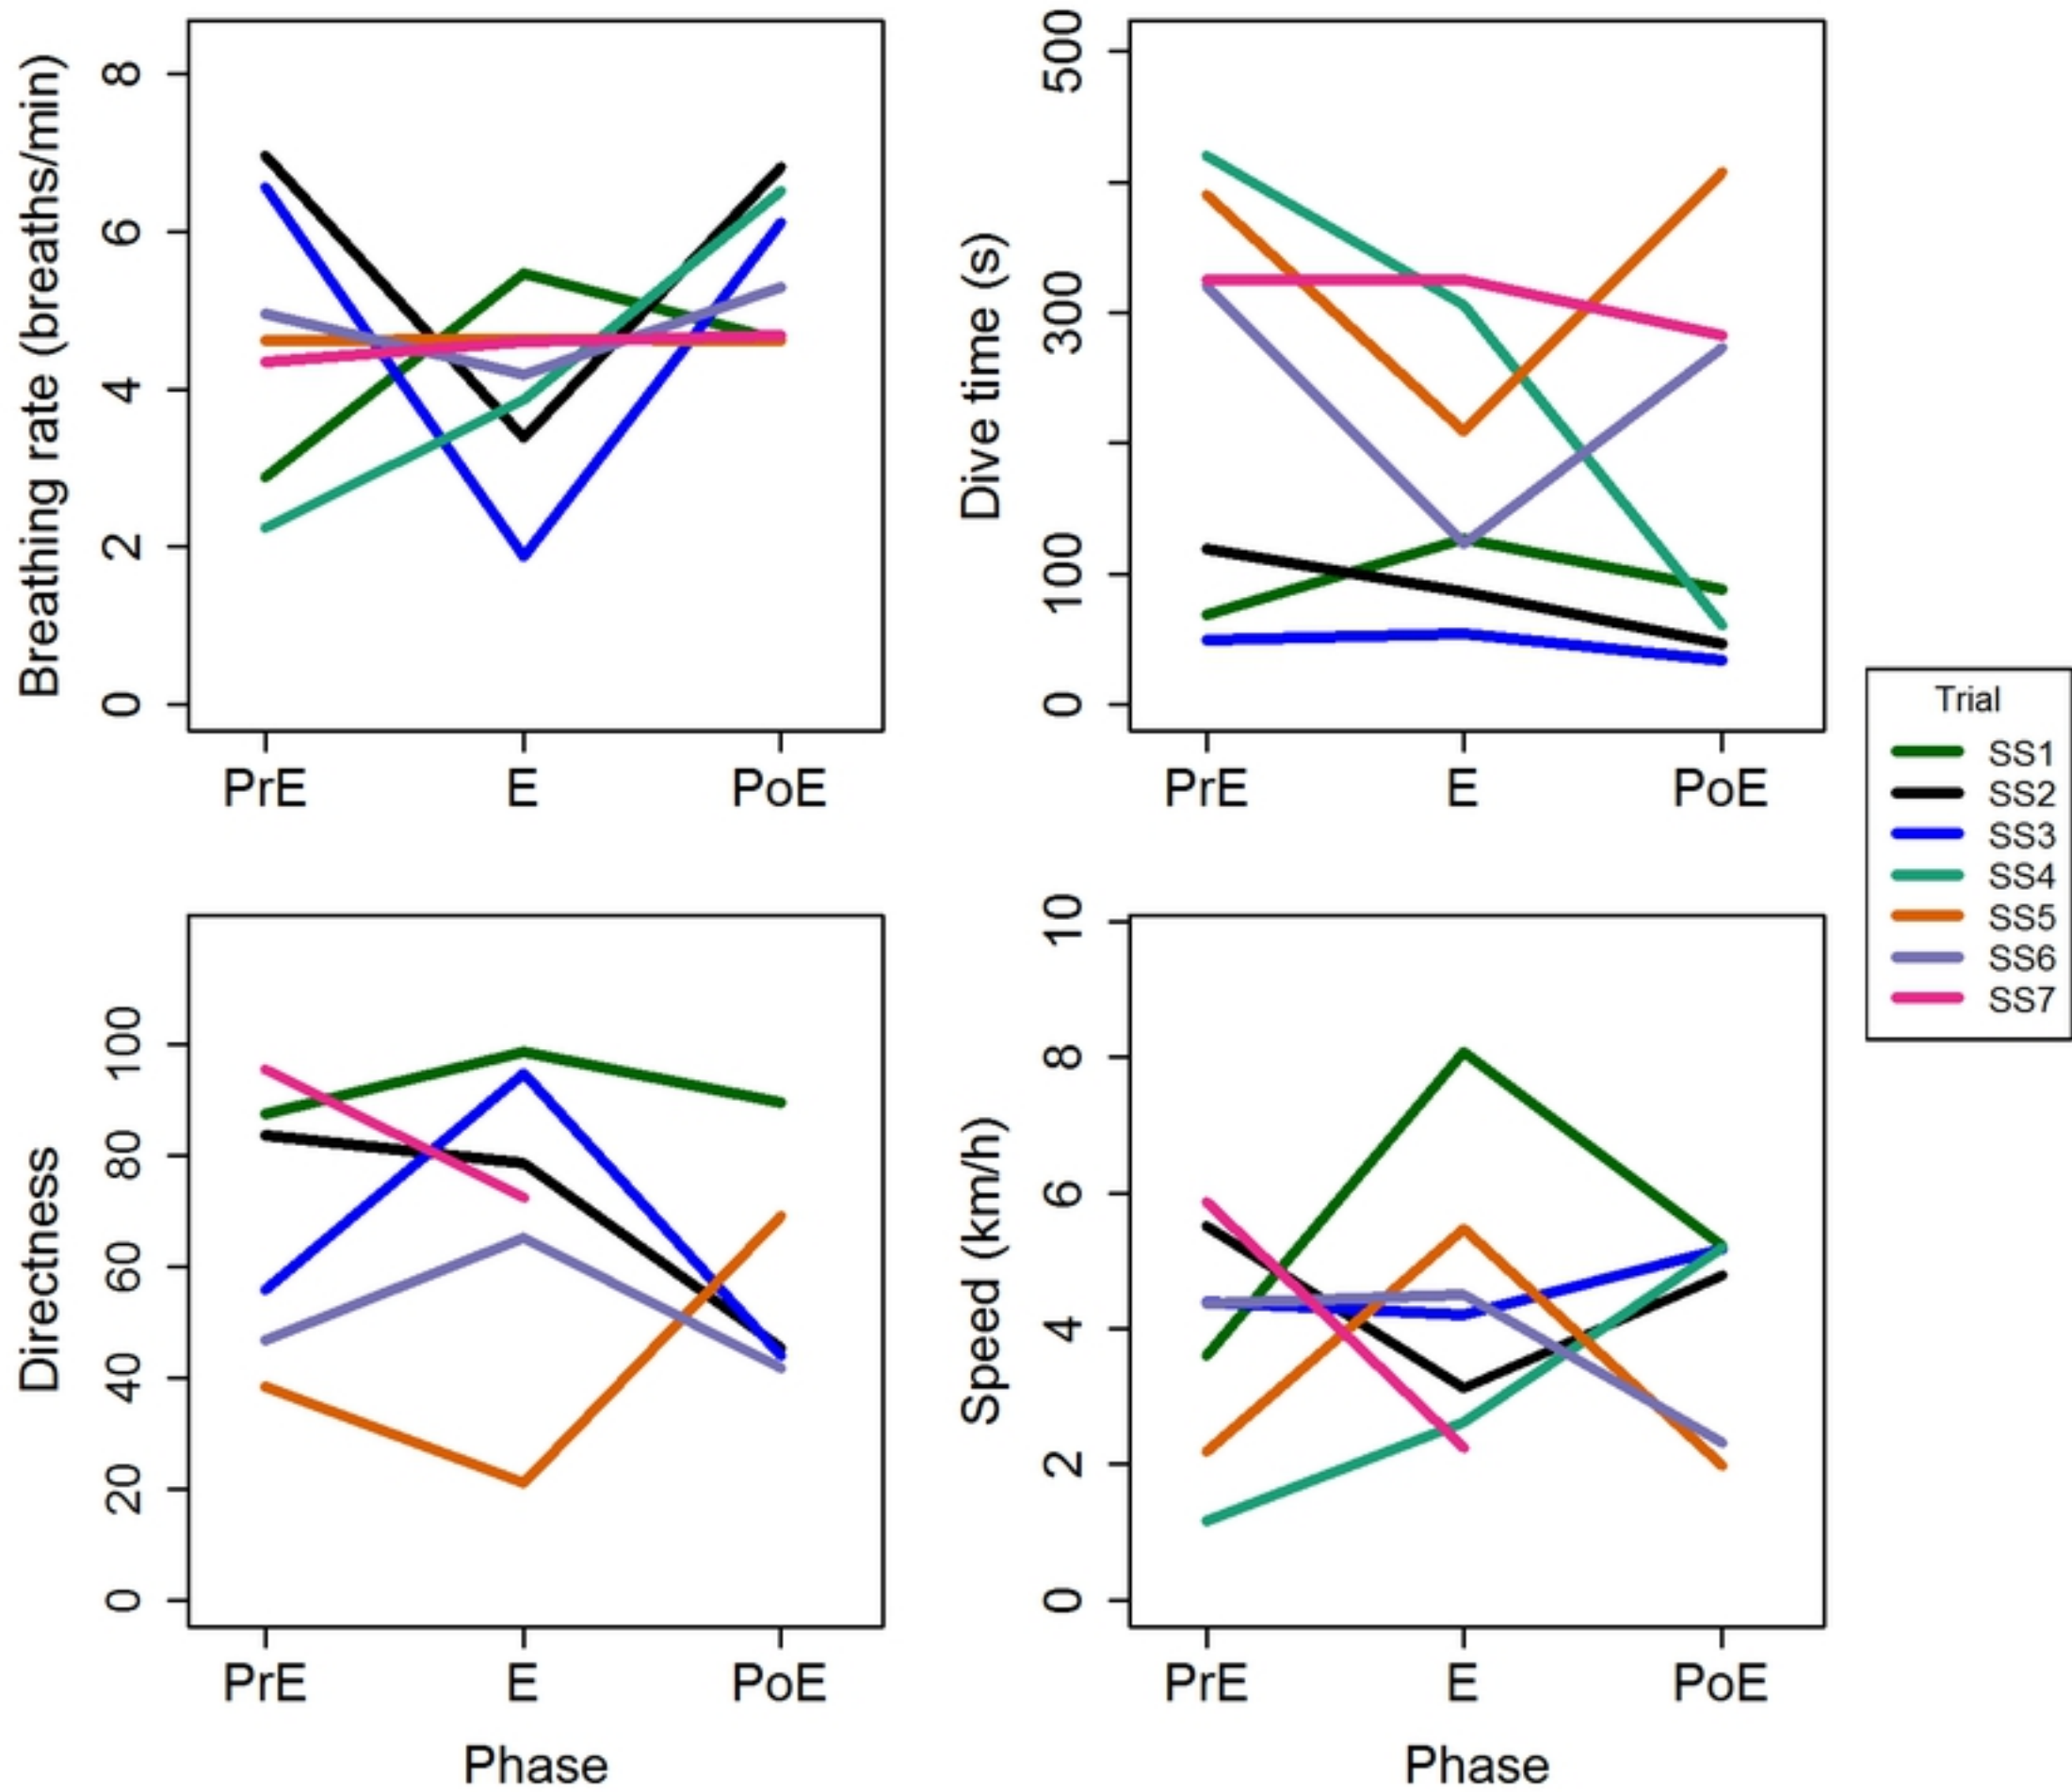

Figure
